# Supplementary material for: Characterization of metabolism-associated molecular patterns in prostate cancer
Source: Springer Nature journal article supplement (doi:10.1186/s12894-023-01275-w), 2023-06-06
Supplement: MOESM2 [file 25455614]

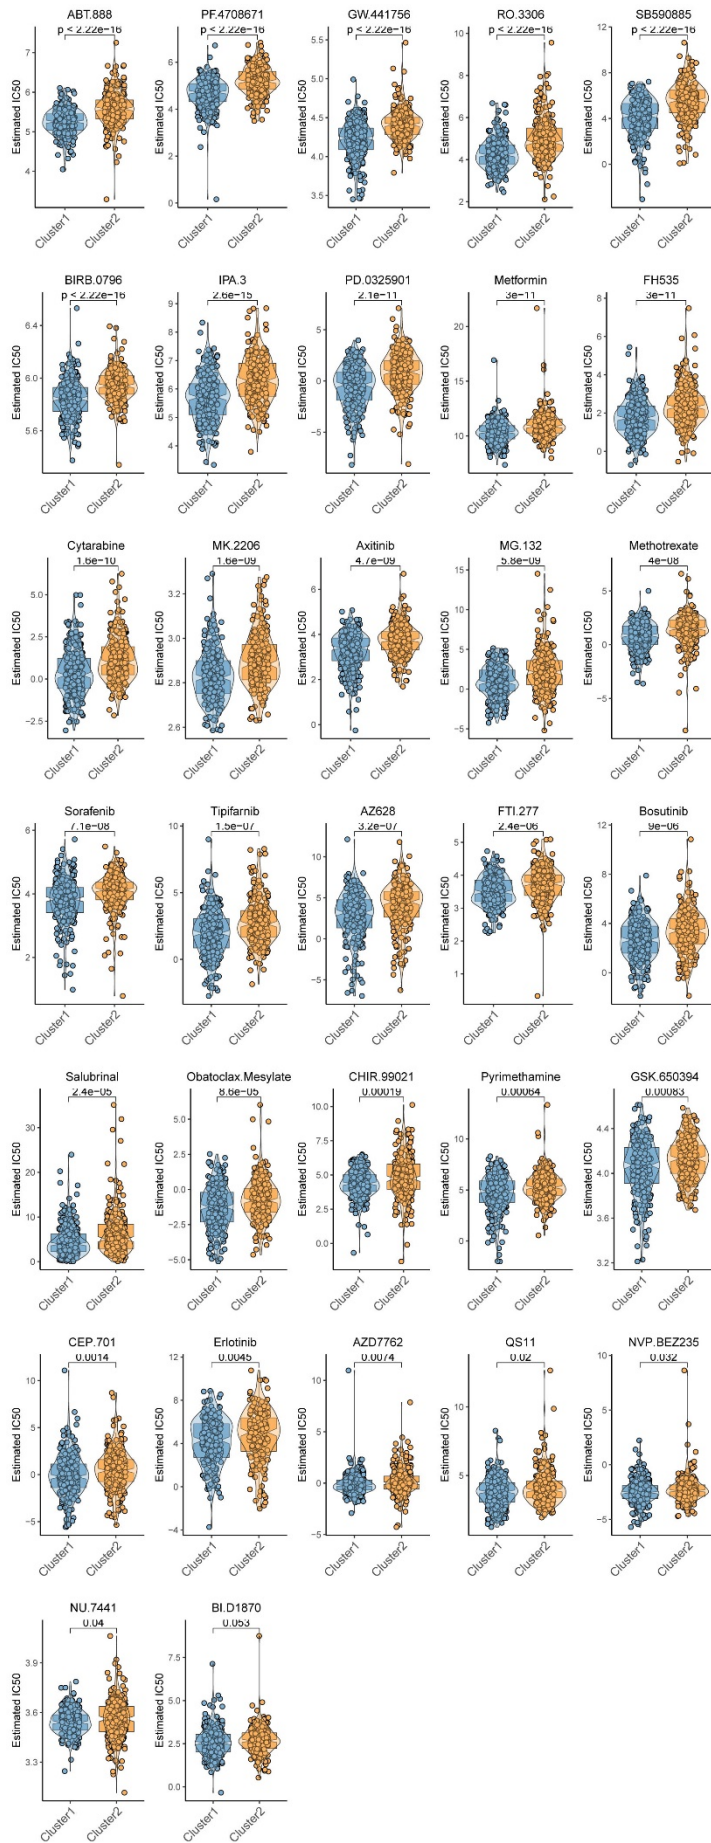

FIGURE S1 IC50 values of 32 drugs between two subclusters.
