# Supplementary material for: Characterization of metabolism-associated molecular patterns in prostate cancer
Source: BMC Urol. 2023 Jun 6;23:104. doi: 10.1186/s12894-023-01275-w (PMC10243086; doi:10.1186/s12894-023-01275-w)
Supplement: Supplementary file 3 — Additional file 3. Table S1_TCGA-PRAD_limma_diff. [file 12894_2023_1275_MOESM3_ESM.xlsx]

## Sheet: TCGA-PRAD_limma_diff
Table S1_TCGA-PRAD_limma_diff
id	logFC	AveExpr	t	P.Value	adj.P.Val	B
PIK3C2G	-1.40596	0.394573	-19.1848	6.01054e-63	1.16166e-58	132.332
GCNT4	-1.37209	1.04431	-17.6437	2.34834e-55	2.26932e-51	115.045
HPN	2.7256	7.48635	16.892	1.03459e-51	4.99886e-48	106.746
KCNJ15	-1.54098	0.786898	-16.6546	1.43358e-50	5.54136e-47	104.146
PRR36	1.80777	4.48896	16.5268	5.86497e-50	1.8892e-46	102.753
C2orf88	-1.89974	1.52789	-16.2011	2.09853e-48	5.79405e-45	99.2149
SIM2	2.45761	4.73436	16.0805	7.83752e-48	1.89345e-44	97.9117
CA14	-1.80817	1.31199	-15.963	2.82154e-47	6.0591e-44	96.6449
MCF2	-1.29373	0.431044	-15.8199	1.33781e-46	2.58558e-43	95.1058
SLC2A9	-1.38418	1.41732	-15.6812	6.01631e-46	1.05707e-42	93.619
SERPINA5	-2.51384	1.28875	-15.5544	2.36585e-45	3.81039e-42	92.2649
HRASLS5	-1.16122	0.843459	-15.4761	5.50052e-45	8.17758e-42	91.4306
CXCR2	-1.2787	0.65065	-15.4617	6.4245e-45	8.86902e-42	91.277
NKAPL	-1.07298	0.929042	-15.2917	3.99092e-44	5.14217e-41	89.4709
TMLHE	-1.34007	1.48832	-15.1898	1.18782e-43	1.43481e-40	88.3924
MARCKSL1	1.51818	9.51183	15.1736	1.41227e-43	1.60559e-40	88.2212
CGREF1	1.97378	4.35427	15.0988	3.13865e-43	3.37004e-40	87.4316
SLC19A1	1.32281	3.92292	15.0088	8.17976e-43	8.32054e-40	86.4844
RAB17	1.4649	4.57787	14.87	3.57212e-42	3.28754e-39	85.0269
PHYHIPL	-1.43992	1.24127	-14.8386	4.98214e-42	4.37681e-39	84.6979
LRFN1	1.23828	2.97332	14.823	5.87525e-42	4.83536e-39	84.5349
ASPA	-1.42223	1.08738	-14.7544	1.21404e-41	9.38548e-39	83.8173
QPRT	-1.82308	2.27461	-14.6809	2.63714e-41	1.8877e-38	83.0503
PAK3	-1.15518	1.02851	-14.5654	8.89607e-41	6.14051e-38	81.8482
CRTAC1	-1.97598	1.52138	-14.5353	1.21958e-40	7.85691e-38	81.5363
HOXC6	2.42358	3.17462	14.315	1.22315e-39	6.75425e-37	79.257
GNAO1	-1.69696	1.87889	-14.2996	1.43638e-39	7.71135e-37	79.0981
NECAB1	-1.37676	1.51892	-14.1986	4.10916e-39	2.14642e-36	78.059
PPARGC1A	-1.33012	1.17413	-14.1512	6.72082e-39	3.41825e-36	77.5727
RHBDL3	-1.02869	0.8963	-13.9678	4.47994e-38	2.16459e-35	75.6975
PYCR1	1.46105	7.44468	13.9419	5.85516e-38	2.69435e-35	75.4329
IGSF1	-1.3789	0.849456	-13.9162	7.62349e-38	3.42649e-35	75.172
KLHL14	-1.34945	0.826653	-13.9054	8.5234e-38	3.7439e-35	75.0617
SBK1	1.36483	3.9146	13.849	1.52216e-37	6.3954e-35	74.4885
PADI3	-1.46855	0.410104	-13.8337	1.78085e-37	7.32309e-35	74.3334
GSTM3	-1.85988	4.56291	-13.7944	2.66508e-37	1.05118e-34	73.9349
NDRG4	-1.30878	1.27802	-13.7901	2.7868e-37	1.07721e-34	73.8908
PNMT	-1.89135	0.988791	-13.7576	3.88933e-37	1.4739e-34	73.5613
STX19	1.76259	4.7306	13.746	4.37736e-37	1.62695e-34	73.4445
PODXL2	1.69963	7.29453	13.7329	5.00528e-37	1.7862e-34	73.312
EPHA10	1.36386	2.23184	13.7314	5.0831e-37	1.7862e-34	73.2967
EVX2	-1.22422	0.672333	-13.7138	6.08687e-37	2.10073e-34	73.1186
TRPM4	1.7322	7.67208	13.6989	7.08715e-37	2.36161e-34	72.9682
AOX1	-2.38858	3.40733	-13.5674	2.71026e-36	8.73018e-34	71.6425
TRIM36	1.56207	4.56121	13.5519	3.17096e-36	1.00467e-33	71.4874
EFNB1	-1.31308	4.30543	-13.536	3.73e-36	1.16274e-33	71.3269
ANGPT1	-2.00251	2.4903	-13.4543	8.54732e-36	2.62213e-33	70.5074
PLLP	-1.09358	1.94609	-13.4226	1.17789e-35	3.54918e-33	70.1905
LURAP1	-1.31306	1.77576	-13.4213	1.19365e-35	3.54918e-33	70.1774
APOBEC3C	-2.23441	4.6195	-13.4193	1.21756e-35	3.56541e-33	70.1578
SMR3B	-1.34635	0.24523	-13.3943	1.56848e-35	4.45796e-33	69.9075
SBSPON	-2.02697	2.49292	-13.3258	3.13099e-35	8.52292e-33	69.2244
C8orf88	-1.92141	2.65414	-13.2452	7.05132e-35	1.84163e-32	68.4222
PCP4L1	-2.25598	2.52894	-13.2362	7.7206e-35	1.98955e-32	68.3326
C19orf48	1.59652	8.10789	13.1186	2.51091e-34	6.38532e-32	67.1673
RAB9B	-1.58304	2.179	-13.004	7.88529e-34	1.90499e-31	66.0366
ZNF154	-1.09329	1.32379	-12.9781	1.01983e-33	2.40369e-31	65.7825
EPHB1	-1.21023	0.892202	-12.97	1.10629e-33	2.57607e-31	65.7021
C11orf45	-1.0692	1.16866	-12.8961	2.305e-33	5.18008e-31	64.9768
STOX2	-1.03518	1.12475	-12.8884	2.48714e-33	5.52517e-31	64.9017
HIST3H2A	1.80106	6.64492	12.8351	4.21839e-33	9.26464e-31	64.3798
PAQR8	-1.52217	2.66339	-12.8288	4.48775e-33	9.74547e-31	64.3186
UBXN10	-1.47352	1.60162	-12.8133	5.23046e-33	1.12321e-30	64.1673
SEMA6D	-1.24313	1.28197	-12.7505	9.72707e-33	1.99995e-30	63.5544
CLU	-2.05545	7.23952	-12.7452	1.02466e-32	2.08458e-30	63.503
GPRC5B	-1.59448	3.10053	-12.7408	1.07051e-32	2.15517e-30	63.4598
EMX2	-1.58568	0.520185	-12.7257	1.24182e-32	2.44904e-30	63.3132
C10orf99	-1.1167	0.377005	-12.7181	1.33857e-32	2.58706e-30	63.239
RPE65	-1.38167	0.83579	-12.7091	1.46212e-32	2.79786e-30	63.1518
NYNRIN	-1.78823	2.68723	-12.6869	1.81978e-32	3.44813e-30	62.9357
DLX1	3.49053	3.96318	12.6833	1.885e-32	3.53703e-30	62.9009
PPP1R14B	1.22469	6.57051	12.6581	2.41478e-32	4.48755e-30	62.6562
FAM83B	-1.46168	1.07207	-12.616	3.64852e-32	6.71571e-30	62.2486
GNAZ	-1.55089	3.03638	-12.5915	4.63911e-32	8.37945e-30	62.0113
NRG2	-1.18886	1.19132	-12.5894	4.73772e-32	8.40054e-30	61.9905
BIK	1.31654	6.37011	12.5331	8.21461e-32	1.41753e-29	61.4469
RND2	-1.32011	1.72191	-12.4841	1.32557e-31	2.22776e-29	60.9743
LGR6	-1.94264	1.62677	-12.4108	2.70647e-31	4.43287e-29	60.2693
GPX2	-2.48708	2.61378	-12.4096	2.73654e-31	4.44446e-29	60.2584
CLCA2	-1.8582	0.965649	-12.382	3.57813e-31	5.76287e-29	59.9936
FAT3	-1.05166	0.8298	-12.3664	4.16462e-31	6.65204e-29	59.8437
GSTP1	-2.04118	6.98877	-12.3635	4.28322e-31	6.78539e-29	59.8159
SAMD12	-1.29979	1.57294	-12.3384	5.46457e-31	8.58648e-29	59.5754
C10orf82	-1.06988	0.520962	-12.2956	8.26454e-31	1.26769e-28	59.1669
ST6GALNAC4	-1.34869	3.12989	-12.2829	9.34637e-31	1.42234e-28	59.0454
ARHGEF38	1.53454	3.95402	12.2802	9.5931e-31	1.44848e-28	59.0196
GOLM1	2.05436	9.5666	12.2739	1.01945e-30	1.51755e-28	58.9596
SNAP25	-1.48696	1.60442	-12.2707	1.05153e-30	1.54755e-28	58.929
MAMLD1	-1.22779	1.65233	-12.2702	1.05695e-30	1.54755e-28	58.9239
PIP5K1B	-1.19033	1.52449	-12.2638	1.12367e-30	1.63287e-28	58.8635
FUT3	-1.21606	0.593185	-12.2551	1.22279e-30	1.76364e-28	58.78
AQP5	-1.30972	0.897906	-12.2521	1.25854e-30	1.80177e-28	58.7515
LMO3	-1.44846	1.5867	-12.2462	1.33202e-30	1.89294e-28	58.6955
CPNE6	-1.51713	1.05146	-12.2431	1.37248e-30	1.9362e-28	58.666
KCTD14	-1.67501	2.20076	-12.1641	2.93675e-30	4.11293e-28	57.9148
DBNDD1	1.28797	4.34849	12.1592	3.07903e-30	4.28118e-28	57.8681
DUOX1	-1.8389	2.30883	-12.1378	3.78103e-30	5.21971e-28	57.6653
ETNK2	-1.2405	2.93383	-12.125	4.27661e-30	5.8207e-28	57.5437
TMEM132C	-1.39114	1.09284	-12.1121	4.84012e-30	6.54161e-28	57.4215
CCBE1	-1.17743	0.975888	-12.0988	5.49491e-30	7.37501e-28	57.2962
TLCD1	1.28063	5.29015	12.0972	5.5841e-30	7.44303e-28	57.2803
COL4A6	-1.86611	2.44375	-12.0762	6.82627e-30	8.97491e-28	57.082
DUOXA1	-1.9627	1.98206	-12.0653	7.57807e-30	9.89604e-28	56.9788
SOSTDC1	-1.45854	1.28626	-12.0624	7.79029e-30	1.01049e-27	56.9515
EYA4	-1.18422	1.41931	-12.0477	8.96396e-30	1.15498e-27	56.813
ACOX2	-1.62684	2.56939	-11.9962	1.4658e-29	1.83958e-27	56.3274
ARL4D	-1.67485	3.51627	-11.9862	1.61227e-29	1.99745e-27	56.2334
GATM	-1.30045	2.29971	-11.9762	1.77315e-29	2.18278e-27	56.1395
SMPDL3B	1.62632	4.76904	11.9694	1.89215e-29	2.31453e-27	56.0754
ADRA1A	-1.52601	1.39206	-11.9679	1.92079e-29	2.33478e-27	56.0605
DUS1L	1.01047	6.46946	11.957	2.13048e-29	2.57348e-27	55.9582
GNAL	-1.33199	2.38967	-11.9345	2.63729e-29	3.12705e-27	55.7476
PRICKLE2	-1.29658	2.38055	-11.913	3.23689e-29	3.74607e-27	55.5453
ARHGAP20	-1.27676	1.45242	-11.9031	3.55699e-29	4.0678e-27	55.4522
MFSD2A	-1.66011	1.15673	-11.8888	4.07424e-29	4.60485e-27	55.3182
PCDH7	-1.73529	2.54968	-11.8751	4.63892e-29	5.18245e-27	55.19
HOXC4	1.87546	2.56694	11.8603	5.3372e-29	5.8944e-27	55.0516
GSTM4	-1.18297	3.12233	-11.8577	5.4707e-29	6.00752e-27	55.0272
SCARA3	-1.72398	4.51355	-11.8557	5.57402e-29	6.08639e-27	55.0088
TMEM132A	1.59699	4.31073	11.8475	6.0256e-29	6.54252e-27	54.9319
BOP1	1.06902	5.57384	11.8222	7.65301e-29	8.21721e-27	54.6958
AKR1B1	-1.68392	4.30384	-11.8081	8.74517e-29	9.2867e-27	54.5642
SLC39A2	-2.51546	1.25103	-11.8064	8.88847e-29	9.38729e-27	54.5481
ARHGEF26	1.49564	5.57668	11.8006	9.38784e-29	9.86081e-27	54.4942
JPH4	-2.00803	2.6659	-11.7889	1.04803e-28	1.09488e-26	54.3855
ALDH1L2	-1.14591	1.24959	-11.7694	1.26077e-28	1.30304e-26	54.2031
SNCG	-1.94166	4.55647	-11.6973	2.48546e-28	2.515e-26	53.5331
C16orf74	-1.27279	1.75823	-11.695	2.53962e-28	2.55642e-26	53.5118
UCN	1.40129	2.6304	11.6763	3.02794e-28	2.97061e-26	53.3382
G0S2	-1.58896	4.03986	-11.6692	3.23733e-28	3.14411e-26	53.2722
C1orf233	1.62692	3.40344	11.6142	5.42024e-28	5.13514e-26	52.7636
CAV2	-1.43066	3.27463	-11.6099	5.64375e-28	5.32081e-26	52.7237
APOBEC3G	-1.41341	2.22271	-11.5991	6.23923e-28	5.85367e-26	52.6247
AFAP1L2	-1.46084	3.36546	-11.5922	6.66077e-28	6.21897e-26	52.5602
SPDEF	1.75595	9.97208	11.5582	9.15006e-28	8.38119e-26	52.2468
PLP2	-1.31139	6.49055	-11.5434	1.05004e-27	9.5364e-26	52.1109
SLC26A6	1.12072	3.67803	11.5429	1.05556e-27	9.5364e-26	52.1058
CYP4B1	-2.34959	2.95444	-11.5428	1.05593e-27	9.5364e-26	52.1054
C12orf75	-1.50153	4.68432	-11.5403	1.08097e-27	9.67216e-26	52.0823
FAXDC2	-1.52892	3.35277	-11.5234	1.26501e-27	1.12151e-25	51.9271
C15orf59	-1.29407	2.09624	-11.5212	1.29181e-27	1.13585e-25	51.9064
LY6G6D	-1.2528	0.893226	-11.5211	1.29295e-27	1.13585e-25	51.9056
CNTFR	-1.63876	2.01515	-11.5146	1.37338e-27	1.20105e-25	51.846
SOX15	-1.4331	2.74521	-11.5131	1.39278e-27	1.21253e-25	51.8322
RBMS3	-1.20702	2.23959	-11.5126	1.39966e-27	1.21306e-25	51.8273
TSLP	-1.30141	1.40817	-11.4987	1.59338e-27	1.37479e-25	51.6994
STAC	-1.97423	2.03092	-11.4959	1.63514e-27	1.40455e-25	51.6738
PDE7B	-1.12083	1.86718	-11.4804	1.8879e-27	1.60738e-25	51.532
AMACR	2.81688	5.62408	11.4594	2.29521e-27	1.9456e-25	51.3392
TMEM252	-1.95564	2.01627	-11.4519	2.45979e-27	2.076e-25	51.2709
TMEM184A	1.16981	4.45015	11.4472	2.57013e-27	2.15034e-25	51.2276
DOK4	-1.11771	3.47615	-11.4445	2.63561e-27	2.19562e-25	51.2028
HSPA4L	-1.1232	1.54158	-11.441	2.72384e-27	2.25939e-25	51.1703
KCNJ5	-1.33952	1.73138	-11.4372	2.82122e-27	2.33016e-25	51.1356
MPP2	-1.34698	2.16056	-11.4323	2.95161e-27	2.42748e-25	51.091
ANO1	-1.70317	3.86737	-11.4084	3.68297e-27	3.01232e-25	50.8726
CFL2	-1.31713	4.45643	-11.4081	3.69389e-27	3.01232e-25	50.8696
SLC25A10	1.02284	4.28348	11.3912	4.31999e-27	3.47885e-25	50.7152
RAP1GAP	1.5726	6.12748	11.3772	4.91771e-27	3.9113e-25	50.5873
CYP4F22	-1.61799	1.17777	-11.3712	5.19776e-27	4.11709e-25	50.5326
B3GNT8	-1.34154	2.11938	-11.3434	6.72148e-27	5.25936e-25	50.279
AQP2	-1.80213	0.304702	-11.3312	7.52055e-27	5.86087e-25	50.1681
CRYAB	-1.86745	5.40263	-11.3298	7.61485e-27	5.91053e-25	50.1558
CHP2	-1.71632	1.30576	-11.3139	8.81973e-27	6.7912e-25	50.0109
ZNF185	-1.69756	4.46857	-11.3032	9.73292e-27	7.46461e-25	49.9137
CPLX1	1.17903	3.13609	11.2901	1.09785e-26	8.32087e-25	49.7949
RHPN1	1.4212	4.37003	11.2793	1.21274e-26	9.08478e-25	49.6967
HFE	-1.25672	2.39424	-11.2595	1.45491e-26	1.07735e-24	49.5171
PLEKHA2	-1.24797	3.42325	-11.2578	1.47757e-26	1.08996e-24	49.5018
RAB7B	-1.31451	2.40503	-11.2556	1.50883e-26	1.10459e-24	49.4812
PLBD1	-1.32166	3.01225	-11.2281	1.94249e-26	1.41138e-24	49.2319
CAV1	-1.74688	5.51121	-11.2271	1.95975e-26	1.41858e-24	49.2232
EZH2	1.03151	2.41393	11.2072	2.35184e-26	1.68974e-24	49.0433
ACTC1	-2.83479	2.94856	-11.2034	2.43597e-26	1.73088e-24	49.0086
TPRN	1.01212	4.59155	11.1941	2.65072e-26	1.85618e-24	48.9252
ABCG2	-1.53281	2.84012	-11.193	2.67776e-26	1.86834e-24	48.9152
GATA3	-2.07997	3.12252	-11.1833	2.92857e-26	2.02869e-24	48.8269
SAPCD2	1.22351	4.53104	11.1826	2.94746e-26	2.03448e-24	48.8206
VSNL1	-1.49688	1.34707	-11.177	3.10243e-26	2.13383e-24	48.77
TSPAN18	-1.55857	3.30073	-11.1677	3.37581e-26	2.31363e-24	48.6867
LRRC56	1.02723	3.65855	11.1594	3.64238e-26	2.47233e-24	48.6117
PTGS1	-1.87704	2.87548	-11.1546	3.80601e-26	2.56302e-24	48.5684
SLC16A5	-1.84673	3.02596	-11.1399	4.35185e-26	2.90028e-24	48.4362
ESRP2	1.13285	5.42718	11.138	4.42928e-26	2.94174e-24	48.4188
ADAMTS5	-1.29962	1.50185	-11.134	4.59202e-26	3.03939e-24	48.3832
RGS10	1.18518	7.46162	11.1152	5.4508e-26	3.55904e-24	48.214
RBP1	-1.4478	3.01495	-11.0976	6.39977e-26	4.16459e-24	48.0557
FEZ1	-1.09981	2.34518	-11.0861	7.11106e-26	4.59651e-24	47.9518
FRMD6	-1.54506	3.50035	-11.0751	7.8586e-26	5.04595e-24	47.8532
TMEM238	1.4331	4.61156	11.069	8.30196e-26	5.31298e-24	47.799
GLIS3	-1.0663	1.49158	-11.0679	8.38923e-26	5.35111e-24	47.7887
FOXA1	1.55702	8.39865	11.0601	9.00479e-26	5.70608e-24	47.7189
PPP1R3C	-1.70397	3.57068	-11.0581	9.17342e-26	5.79394e-24	47.7006
P2RY2	-1.05762	1.0564	-11.0482	1.00325e-25	6.29538e-24	47.6123
TMEM37	-1.27172	2.11946	-11.0436	1.04594e-25	6.52274e-24	47.5712
FAM107A	-1.75895	4.37286	-11.0436	1.04623e-25	6.52274e-24	47.5709
PRKCB	-1.47642	1.93785	-11.0431	1.0509e-25	6.53078e-24	47.5665
ST6GALNAC2	-1.2492	1.92139	-11.0226	1.26575e-25	7.76606e-24	47.383
MAL	-1.65071	1.91375	-11.0084	1.44031e-25	8.78135e-24	47.2556
HIF3A	-1.18329	1.32472	-10.9977	1.58701e-25	9.6453e-24	47.1599
PENK	-1.89099	1.6649	-10.9958	1.61424e-25	9.78006e-24	47.1432
LPCAT2	-1.29989	2.75893	-10.9901	1.69897e-25	1.02612e-23	47.0927
LRRN3	-1.19918	1.0364	-10.9883	1.72792e-25	1.04036e-23	47.076
PGF	-1.201	1.78841	-10.9813	1.84048e-25	1.10469e-23	47.0138
NDRG2	-1.26326	5.36357	-10.9495	2.45343e-25	1.45008e-23	46.7303
MYOCD	-1.71635	2.511	-10.9459	2.53415e-25	1.48868e-23	46.6983
ALDH3A1	-1.0118	0.941138	-10.9355	2.78504e-25	1.62128e-23	46.6052
SLCO3A1	-1.08182	1.95415	-10.9275	2.99171e-25	1.726e-23	46.5346
TPM1	-1.36378	6.80645	-10.921	3.17246e-25	1.82483e-23	46.4768
HOXD13	-1.94982	2.98119	-10.908	3.56959e-25	2.04717e-23	46.3605
DUOX2	-1.46122	0.985765	-10.9043	3.69028e-25	2.1039e-23	46.3277
TMEM35	-2.09619	3.35117	-10.9038	3.70736e-25	2.10742e-23	46.3231
C1orf186	-1.02163	0.858482	-10.8962	3.9672e-25	2.24193e-23	46.2563
CSRP1	-1.52754	7.67391	-10.8953	4.00069e-25	2.25427e-23	46.248
NKX2-3	1.53126	1.5587	10.8782	4.66623e-25	2.61809e-23	46.0963
TCF7L1	-1.21211	3.38776	-10.8765	4.73747e-25	2.64628e-23	46.0813
FAT2	-1.43763	1.37081	-10.8736	4.863e-25	2.70857e-23	46.0555
HSPB8	-2.16413	6.04358	-10.8645	5.27733e-25	2.92249e-23	45.9749
GJB4	-1.05616	0.789904	-10.8596	5.51581e-25	3.03715e-23	45.9313
PRKG1	-1.31318	1.95461	-10.8414	6.49517e-25	3.55123e-23	45.7702
RAC3	1.21466	5.68472	10.8413	6.50456e-25	3.55123e-23	45.7687
RBFOX3	-1.65463	1.91575	-10.8409	6.52641e-25	3.55313e-23	45.7654
HOXB13	1.58804	8.9809	10.829	7.26363e-25	3.92135e-23	45.6599
TGFBR3	-1.40596	3.60174	-10.8183	7.99408e-25	4.27982e-23	45.5654
ME1	-1.45453	3.08393	-10.8136	8.33524e-25	4.43788e-23	45.5242
CAMKK2	1.47655	7.04139	10.783	1.09662e-24	5.77502e-23	45.2537
FOLR1	-1.4741	1.33008	-10.7809	1.11741e-24	5.86851e-23	45.2352
CYP3A5	-1.77625	1.73639	-10.7578	1.37397e-24	7.11924e-23	45.0314
GJB5	-1.8552	2.07094	-10.7562	1.39309e-24	7.19899e-23	45.0177
RRAS	-1.05593	7.18662	-10.722	1.8907e-24	9.64155e-23	44.7166
LYVE1	-1.34433	1.42978	-10.6973	2.35676e-24	1.18309e-22	44.4993
MYLK	-2.12504	6.02648	-10.697	2.36318e-24	1.18324e-22	44.4967
ID4	-1.882	4.58975	-10.6902	2.50987e-24	1.25344e-22	44.4373
LARGE	-1.05539	3.06828	-10.6798	2.75244e-24	1.37104e-22	44.3463
RAB38	-1.18815	1.92068	-10.6701	3.00037e-24	1.48307e-22	44.2613
SLMAP	-1.02963	4.34089	-10.6411	3.88429e-24	1.89097e-22	44.0067
PDZRN4	-1.56049	2.67189	-10.6253	4.46525e-24	2.16834e-22	43.8693
FBXO17	-1.36722	2.56022	-10.615	4.89272e-24	2.36996e-22	43.7792
SEMG1	-3.9369	1.325	-10.6018	5.50233e-24	2.65196e-22	43.6634
CTF1	-1.47805	3.61292	-10.5788	6.74282e-24	3.22038e-22	43.463
ALDH1A2	-1.52587	2.85524	-10.5787	6.74835e-24	3.22038e-22	43.4622
CLVS2	-1.05812	0.945551	-10.5512	8.60461e-24	4.04626e-22	43.2227
MYZAP	-1.33612	2.72907	-10.5441	9.1564e-24	4.29529e-22	43.1614
DAAM2	-1.57365	2.90586	-10.5171	1.16233e-23	5.36144e-22	42.9262
FERMT2	-1.27015	4.27882	-10.5156	1.17768e-23	5.41927e-22	42.9133
ATAD3C	-1.08316	1.74218	-10.5059	1.28297e-23	5.88977e-22	42.8289
ANO5	-1.3464	1.86126	-10.4991	1.36161e-23	6.23599e-22	42.7703
ACSS3	-1.00507	1.55327	-10.4904	1.47028e-23	6.70189e-22	42.6946
S100A14	-2.29897	3.21204	-10.478	1.63881e-23	7.43502e-22	42.5876
GPM6A	-1.30244	1.37421	-10.4734	1.70698e-23	7.67226e-22	42.5475
UNC5B	-1.52833	3.51388	-10.4598	1.92235e-23	8.62026e-22	42.4303
ST5	-1.19386	3.3936	-10.4538	2.02657e-23	9.06654e-22	42.3783
CLDN3	1.30368	9.13296	10.4517	2.06402e-23	9.21276e-22	42.3603
TMEM246	-1.53729	2.57034	-10.4328	2.4369e-23	1.08274e-21	42.1966
ARHGAP23	-1.38755	3.23964	-10.4328	2.43696e-23	1.08274e-21	42.1966
SLITRK6	-1.62821	2.24373	-10.4316	2.46317e-23	1.08937e-21	42.186
ANO6	-1.36377	4.19578	-10.4031	3.16098e-23	1.38218e-21	41.9402
MUC15	-1.28716	1.14527	-10.4019	3.19243e-23	1.39278e-21	41.9304
COL17A1	-2.23973	3.27675	-10.4001	3.24553e-23	1.40014e-21	41.9142
KCNJ3	-1.72439	1.44625	-10.395	3.39282e-23	1.45718e-21	41.8704
CTTNBP2	-1.01085	1.49705	-10.3785	3.91907e-23	1.67575e-21	41.7283
POPDC2	-1.4214	3.89785	-10.3729	4.11301e-23	1.74325e-21	41.6807
EPCAM	1.15933	8.26566	10.372	4.14529e-23	1.75309e-21	41.673
GPR87	-1.93698	2.4932	-10.3603	4.59337e-23	1.91328e-21	41.5719
FGFRL1	1.36709	5.73507	10.3506	4.99833e-23	2.07302e-21	41.4886
GSTM5	-1.36695	2.40494	-10.3463	5.18679e-23	2.14658e-21	41.4521
DNAJB5	-1.31004	3.5357	-10.3108	7.06824e-23	2.88202e-21	41.1472
FGF10	-1.31103	1.42997	-10.2919	8.32671e-23	3.36674e-21	40.9857
TMEM40	-1.1642	1.09244	-10.2858	8.78198e-23	3.53603e-21	40.9332
ACSF2	-1.37534	3.0135	-10.2841	8.91355e-23	3.58154e-21	40.9186
MRPL41	1.03674	7.7105	10.2832	8.98099e-23	3.60115e-21	40.9112
STK26	-1.19056	4.20924	-10.2714	9.95065e-23	3.9817e-21	40.8101
AHNAK2	-1.44828	2.24272	-10.2694	1.01238e-22	4.03428e-21	40.7931
FGFR2	-1.79179	3.50584	-10.2691	1.01527e-22	4.03747e-21	40.7903
CREB3L4	1.06696	8.23927	10.2625	1.07462e-22	4.25598e-21	40.7343
NAV2	-1.18062	1.93129	-10.2422	1.28131e-22	5.02312e-21	40.561
NCAM1	-1.47706	1.713	-10.2353	1.36078e-22	5.32383e-21	40.5017
APOC1	1.90699	5.05448	10.2338	1.3786e-22	5.37181e-21	40.4889
MECOM	-1.24154	2.28098	-10.2268	1.46399e-22	5.67023e-21	40.4297
MCC	-1.37746	2.93323	-10.2201	1.55188e-22	5.96287e-21	40.3722
B3GALT2	-1.30166	1.72627	-10.2154	1.61596e-22	6.1845e-21	40.3324
B3GNT9	-1.28067	3.59469	-10.2128	1.65328e-22	6.31011e-21	40.3099
CCDC8	-1.46254	3.19232	-10.2126	1.65532e-22	6.31011e-21	40.3087
SLC43A1	1.56974	5.99994	10.2013	1.8254e-22	6.93112e-21	40.2123
TP63	-2.21491	3.08184	-10.1981	1.87602e-22	7.10938e-21	40.1854
PLA2G4A	-1.36598	3.27823	-10.1708	2.37484e-22	8.89505e-21	39.9531
BHMT2	-1.2918	2.44435	-10.1583	2.64392e-22	9.84568e-21	39.8473
PRAC1	2.10565	9.2681	10.1519	2.79429e-22	1.03064e-20	39.7928
RPL22L1	1.16578	5.75867	10.1498	2.84547e-22	1.04552e-20	39.775
ASPHD1	1.27551	3.1195	10.1443	2.9829e-22	1.09394e-20	39.7285
TINAGL1	-1.2764	4.31627	-10.1438	2.99698e-22	1.09702e-20	39.7238
LDB3	-1.86463	3.07243	-10.1272	3.45656e-22	1.2581e-20	39.5833
ARHGEF40	-1.04967	3.42687	-10.1254	3.5102e-22	1.27522e-20	39.5681
MAMDC2	-1.31723	2.2577	-10.1203	3.66672e-22	1.32958e-20	39.5252
METTL24	-1.07192	1.38201	-10.119	3.70745e-22	1.34183e-20	39.5143
PGR	-1.0776	1.46987	-10.1166	3.78657e-22	1.36791e-20	39.4935
BNIPL	-1.55557	2.18845	-10.1155	3.82124e-22	1.37529e-20	39.4845
JAZF1	-1.31363	3.86667	-10.1149	3.84233e-22	1.38031e-20	39.4791
CCDC69	-1.333	4.19701	-10.1044	4.20366e-22	1.50731e-20	39.3905
GLIS1	-1.37312	2.14259	-10.1041	4.21363e-22	1.50809e-20	39.3882
C16orf45	-1.18555	4.09843	-10.0982	4.43153e-22	1.57732e-20	39.3385
METTL7A	-1.18177	5.951	-10.0771	5.31202e-22	1.87688e-20	39.16
RASL12	-1.64525	4.95854	-10.0639	5.94783e-22	2.08249e-20	39.0487
C2orf72	2.02025	5.13691	10.0631	5.9864e-22	2.09221e-20	39.0423
FOLH1	2.33674	8.01309	10.0594	6.17929e-22	2.15053e-20	39.011
ANP32E	-1.14426	4.16183	-10.0593	6.18665e-22	2.15053e-20	39.0099
PRR7	1.20653	2.56171	10.0536	6.49234e-22	2.25274e-20	38.9624
KITLG	-1.30229	3.55439	-10.0516	6.60461e-22	2.28759e-20	38.9455
GSC	1.14161	2.14825	10.0506	6.66317e-22	2.30374e-20	38.9368
ANGPTL1	-1.47662	1.93913	-10.0382	7.40994e-22	2.5528e-20	38.8322
ZNF516	-1.28361	2.9042	-10.0357	7.56905e-22	2.60297e-20	38.8112
GAL	1.7105	2.62225	10.0248	8.30433e-22	2.83565e-20	38.7199
KIAA1161	-1.04819	2.32264	-10.0222	8.4947e-22	2.89554e-20	38.6976
DMD	-1.36674	2.46977	-10.0187	8.74965e-22	2.97719e-20	38.6685
BEND5	-1.00259	2.3421	-10.0045	9.87525e-22	3.34254e-20	38.5493
C20orf194	-1.04001	3.03119	-9.98144	1.20189e-21	4.02582e-20	38.3558
TES	-1.0003	5.68102	-9.97165	1.30629e-21	4.36794e-20	38.2737
ENTPD3	-1.15458	2.18302	-9.96885	1.33779e-21	4.45783e-20	38.2503
CAPN6	-1.82251	2.31941	-9.96139	1.42538e-21	4.73339e-20	38.1878
NEURL1B	-1.13379	3.92029	-9.95944	1.44914e-21	4.7958e-20	38.1715
FXYD6	-1.48278	3.53308	-9.94094	1.6956e-21	5.52629e-20	38.0169
ITGB3	-1.01631	1.3237	-9.94012	1.70758e-21	5.55597e-20	38.0099
MAP1A	-1.2855	2.46195	-9.9327	1.81841e-21	5.87699e-20	37.948
SLC8A1	-1.27694	2.11102	-9.91526	2.10821e-21	6.77625e-20	37.8024
KCNAB1	-1.44763	2.59044	-9.91512	2.11068e-21	6.77625e-20	37.8012
SP6	-1.05321	2.04195	-9.90508	2.29797e-21	7.35311e-20	37.7175
FAM167A	-1.27444	1.35448	-9.90373	2.32444e-21	7.42554e-20	37.7062
KCNMB1	-1.61922	4.04717	-9.89915	2.4164e-21	7.66861e-20	37.668
MR1	-1.1602	2.80534	-9.89028	2.60465e-21	8.25248e-20	37.5941
LPAR1	-1.2122	3.49291	-9.88786	2.65856e-21	8.39575e-20	37.574
SRD5A2	-1.87944	3.14672	-9.88612	2.69783e-21	8.49201e-20	37.5595
PLCL1	-1.38033	2.10677	-9.88556	2.71063e-21	8.51842e-20	37.5549
MXRA7	-1.28899	4.62687	-9.88159	2.80326e-21	8.78298e-20	37.5218
FILIP1	-1.04201	1.26498	-9.88156	2.8039e-21	8.78298e-20	37.5215
CRABP2	-1.99166	5.21224	-9.86998	3.09226e-21	9.63759e-20	37.4252
MEIS1	-1.12383	2.50173	-9.86033	3.35459e-21	1.03569e-19	37.345
PAEP	-1.54469	0.274068	-9.85876	3.39927e-21	1.04781e-19	37.3319
IP6K3	-1.4464	1.53211	-9.84963	3.67146e-21	1.12811e-19	37.2561
DNAJB4	-1.26894	3.43289	-9.84552	3.80096e-21	1.1642e-19	37.222
DAB1	-1.23348	1.30801	-9.83518	4.14737e-21	1.26429e-19	37.1361
CHRDL1	-2.08724	5.34174	-9.81588	4.87891e-21	1.48262e-19	36.9761
NRXN3	-1.00457	1.38902	-9.8142	4.94868e-21	1.50146e-19	36.9622
FOXI1	-1.71311	1.05226	-9.81365	4.97154e-21	1.50603e-19	36.9576
CLIP3	-1.38856	4.33424	-9.80834	5.19851e-21	1.56987e-19	36.9137
CERK	-1.10618	3.42765	-9.79906	5.62056e-21	1.69203e-19	36.8368
FAM46B	-1.63633	3.23926	-9.79727	5.70587e-21	1.71238e-19	36.822
AVPI1	-1.17485	4.58308	-9.79677	5.72966e-21	1.71685e-19	36.8179
LIX1	-1.13446	0.912225	-9.78384	6.38711e-21	1.89041e-19	36.7109
NDP	-1.51558	2.16071	-9.77967	6.61431e-21	1.95466e-19	36.6765
NCS1	-1.10951	4.88651	-9.77311	6.98877e-21	2.05902e-19	36.6223
SERPINB5	-1.90029	2.23879	-9.77025	7.15867e-21	2.10267e-19	36.5986
PALLD	-1.45545	5.88519	-9.75538	8.10939e-21	2.34978e-19	36.4759
PDK4	-2.06858	5.24416	-9.75056	8.44342e-21	2.43925e-19	36.4361
C1orf106	-1.35703	1.66629	-9.74673	8.71882e-21	2.51297e-19	36.4045
NT5E	-1.28316	3.0602	-9.74665	8.72461e-21	2.51297e-19	36.4039
CA12	-1.26136	2.26292	-9.74226	9.05134e-21	2.6032e-19	36.3677
C3orf70	-1.26039	2.68437	-9.73555	9.57384e-21	2.73718e-19	36.3124
SLC18A2	-1.47155	1.19644	-9.73346	9.74293e-21	2.78023e-19	36.2952
PTP4A3	1.51863	6.57486	9.73084	9.95828e-21	2.83035e-19	36.2737
AJUBA	-1.19618	3.00537	-9.72308	1.06267e-20	3.00705e-19	36.2097
SNAI2	-1.68716	3.83097	-9.71926	1.09715e-20	3.10009e-19	36.1783
C1QTNF1	-1.33353	4.17687	-9.71404	1.14605e-20	3.23353e-19	36.1354
WIF1	-2.05743	2.03322	-9.71278	1.15817e-20	3.26296e-19	36.125
ANXA6	-1.22384	6.05373	-9.70889	1.19641e-20	3.35602e-19	36.093
PGM5	-2.00556	5.28644	-9.70739	1.21146e-20	3.38175e-19	36.0807
SVIL	-1.35027	5.34588	-9.70728	1.21258e-20	3.38175e-19	36.0798
CHST2	-1.36932	3.10755	-9.70608	1.22478e-20	3.41085e-19	36.07
CENPM	1.25068	2.78011	9.70316	1.25509e-20	3.48521e-19	36.0459
NEK5	1.13568	2.1192	9.69616	1.33061e-20	3.67907e-19	35.9884
CACHD1	-1.24271	2.63708	-9.68989	1.40202e-20	3.86546e-19	35.9369
VWA5A	-1.27486	3.06686	-9.68231	1.49345e-20	4.10582e-19	35.8747
RASL10B	-1.02428	1.50389	-9.68008	1.52156e-20	4.17717e-19	35.8564
SYNPO2	-1.96359	5.98123	-9.6677	1.68681e-20	4.60938e-19	35.7549
PAQR6	1.63402	3.4318	9.66758	1.68854e-20	4.60938e-19	35.7539
SEC23A	-1.02572	3.81662	-9.6554	1.86872e-20	5.06547e-19	35.6541
FAM162B	-1.08413	2.17615	-9.64426	2.05017e-20	5.53404e-19	35.5629
CAPG	-1.35952	5.52418	-9.64206	2.08797e-20	5.6282e-19	35.5449
SCARA5	-1.23975	0.881524	-9.63948	2.13328e-20	5.74233e-19	35.5238
ADRB1	1.35965	4.98636	9.63869	2.14726e-20	5.77193e-19	35.5173
CEND1	-1.22859	1.80516	-9.6339	2.23452e-20	5.98983e-19	35.4781
GJA1	-1.50418	6.13521	-9.62922	2.32304e-20	6.20986e-19	35.4399
CPA6	-1.73794	1.99004	-9.6245	2.41595e-20	6.44932e-19	35.4013
SNX7	-1.15864	3.91809	-9.6173	2.56469e-20	6.82751e-19	35.3425
NUP210	1.13075	4.82188	9.61602	2.59216e-20	6.89115e-19	35.332
GPM6B	-1.12291	3.30159	-9.61508	2.61244e-20	6.93552e-19	35.3243
MSRB3	-1.54796	4.83491	-9.60133	2.92801e-20	7.73082e-19	35.2121
KCNS1	-1.055	0.748828	-9.60054	2.94722e-20	7.77094e-19	35.2056
SGCB	-1.06913	4.54051	-9.5982	3.00476e-20	7.91185e-19	35.1866
PATE4	-1.3922	0.215227	-9.59511	3.08268e-20	8.10597e-19	35.1614
ATP2B4	-1.54279	4.71202	-9.5945	3.09853e-20	8.13658e-19	35.1564
MEIS2	-1.41005	3.18572	-9.58063	3.47548e-20	9.11407e-19	35.0434
CLIP4	-1.088	2.95363	-9.57372	3.68004e-20	9.62439e-19	34.9871
TCEAL2	-1.69485	3.96792	-9.57277	3.70893e-20	9.68683e-19	34.9794
PLS3	-1.14619	4.20507	-9.56458	3.96888e-20	1.02962e-18	34.9127
SPTBN2	1.10333	5.92444	9.56282	4.02703e-20	1.04191e-18	34.8984
SCGB3A1	-2.37313	2.71791	-9.5608	4.09495e-20	1.05806e-18	34.882
EFEMP1	-1.48926	5.02141	-9.53419	5.101e-20	1.29972e-18	34.6658
PATE1	-1.77314	0.306482	-9.52345	5.57328e-20	1.4173e-18	34.5786
PDGFD	-1.19745	3.33917	-9.52116	5.67968e-20	1.44246e-18	34.56
DNAH5	1.56235	2.79915	9.50731	6.36574e-20	1.59988e-18	34.4478
GDF10	-1.02632	0.772431	-9.50557	6.4576e-20	1.62086e-18	34.4337
HOXB2	-1.19346	2.60302	-9.50381	6.55215e-20	1.64033e-18	34.4194
ASB2	-1.43378	3.11375	-9.50133	6.68734e-20	1.66554e-18	34.3993
EDN3	-1.45583	1.43422	-9.49977	6.77356e-20	1.68485e-18	34.3867
RGN	-1.2299	2.67983	-9.4929	7.16712e-20	1.77816e-18	34.3311
SMKR1	1.22183	2.67907	9.4831	7.7689e-20	1.91273e-18	34.2518
SYNM	-1.9038	6.13342	-9.48218	7.8274e-20	1.92468e-18	34.2444
ATP1A2	-1.90477	3.55731	-9.48062	7.92868e-20	1.94464e-18	34.2318
ZP3	1.17933	3.29558	9.47805	8.09793e-20	1.97862e-18	34.211
APOBEC3D	-1.0158	1.73967	-9.47331	8.41947e-20	2.05458e-18	34.1727
NUDT10	-1.4555	3.90248	-9.46713	8.85723e-20	2.15325e-18	34.1228
SPINK2	-1.76007	0.919115	-9.46054	9.34965e-20	2.26442e-18	34.0696
TGM3	1.94936	3.38847	9.45684	9.63817e-20	2.33137e-18	34.0397
MYOF	-1.53053	4.75233	-9.44343	1.07578e-19	2.5957e-18	33.9315
ANKRD65	-1.11758	3.74878	-9.44011	1.10542e-19	2.66057e-18	33.9048
ADM2	1.19799	4.60555	9.43946	1.11134e-19	2.6715e-18	33.8995
PRAC2	1.33225	6.04925	9.43189	1.18244e-19	2.83536e-18	33.8385
PDLIM5	1.68798	8.12853	9.43043	1.19661e-19	2.86225e-18	33.8268
ROR2	-1.46323	3.4134	-9.41726	1.33283e-19	3.16457e-18	33.7207
PRIMA1	-1.31296	2.22486	-9.41178	1.39386e-19	3.2967e-18	33.6767
GPR161	-1.10964	2.58356	-9.41153	1.39676e-19	3.2967e-18	33.6746
GDF15	1.88369	8.60579	9.40431	1.48162e-19	3.49211e-18	33.6166
B4GALNT4	1.50589	3.95878	9.39861	1.55229e-19	3.64976e-18	33.5708
SH3PXD2B	-1.07744	3.39167	-9.39412	1.61027e-19	3.7815e-18	33.5347
FOXQ1	-1.67962	2.68797	-9.39367	1.61612e-19	3.79063e-18	33.5311
PTPLA	-1.0294	2.63041	-9.38997	1.66566e-19	3.89737e-18	33.5014
NETO2	1.2506	2.13461	9.38177	1.78096e-19	4.15708e-18	33.4356
ABCC4	1.79327	7.57279	9.37529	1.87756e-19	4.36674e-18	33.3836
S100A16	-1.32829	5.28744	-9.37405	1.89671e-19	4.40597e-18	33.3736
SPATA18	-1.22823	2.33219	-9.37098	1.9448e-19	4.50686e-18	33.349
BIRC5	1.35347	2.43594	9.36983	1.96303e-19	4.53821e-18	33.3398
EDDM3A	-1.17831	0.154324	-9.36237	2.08606e-19	4.81112e-18	33.28
ZBTB7C	-1.11229	1.88624	-9.35946	2.13613e-19	4.91488e-18	33.2567
SMIM10	-1.22625	3.41144	-9.35673	2.18423e-19	5.01692e-18	33.2348
CDC42EP3	-1.11592	4.74392	-9.35525	2.2106e-19	5.06811e-18	33.223
S100A6	-1.35861	8.67109	-9.35369	2.23895e-19	5.12097e-18	33.2104
PRTFDC1	-1.02028	2.25946	-9.34181	2.46612e-19	5.60737e-18	33.1154
FAM222A	1.3169	3.17415	9.34166	2.46915e-19	5.60767e-18	33.1142
VAV3	-1.0367	1.82491	-9.3351	2.60437e-19	5.90782e-18	33.0617
VCL	-1.36312	5.62101	-9.33235	2.66326e-19	6.03433e-18	33.0397
TMSB15A	1.80478	6.84595	9.32994	2.71582e-19	6.13565e-18	33.0205
CCND2	-1.31232	4.20627	-9.31844	2.98188e-19	6.70906e-18	32.9286
MRAP2	-1.13771	2.99475	-9.30896	3.22011e-19	7.18651e-18	32.8529
ITGB1BP2	-1.01054	1.82038	-9.30733	3.26314e-19	7.253e-18	32.8399
KLK2	1.70719	11.2732	9.30468	3.33389e-19	7.3977e-18	32.8188
GPR160	1.16484	5.87361	9.29821	3.5135e-19	7.78731e-18	32.7672
LMOD1	-1.74676	6.79128	-9.29732	3.53908e-19	7.83503e-18	32.76
KIT	-1.27141	2.3152	-9.29716	3.54359e-19	7.83603e-18	32.7588
PRRG4	-1.21008	3.60206	-9.29534	3.59632e-19	7.94355e-18	32.7443
RGS7BP	-1.19368	1.63833	-9.28866	3.79615e-19	8.35629e-18	32.6911
FGF7	-1.33723	2.14638	-9.28226	3.99835e-19	8.79136e-18	32.64
NRK	-1.03816	1.08657	-9.26846	4.47064e-19	9.75216e-18	32.5302
TGM1	-1.00264	1.46272	-9.26804	4.48591e-19	9.77444e-18	32.5269
TRIP6	-1.04547	5.29662	-9.26399	4.63494e-19	1.00695e-17	32.4947
MBNL2	-1.17429	4.65956	-9.25829	4.85369e-19	1.05165e-17	32.4494
ANXA2	-1.16743	6.21736	-9.25796	4.86642e-19	1.05323e-17	32.4468
KIAA1210	-1.68329	1.98964	-9.25522	4.97566e-19	1.07447e-17	32.425
KANK2	-1.19818	5.5868	-9.25085	5.15434e-19	1.11057e-17	32.3903
LRIG1	1.06034	6.89497	9.24334	5.47673e-19	1.1761e-17	32.3306
SDPR	-1.40379	4.7942	-9.23758	5.73713e-19	1.22792e-17	32.2849
LENG9	1.03755	5.34292	9.23409	5.90122e-19	1.26165e-17	32.2572
SLC2A5	-1.84372	2.29267	-9.22594	6.30177e-19	1.34283e-17	32.1926
CRACR2B	1.26387	5.93585	9.21691	6.77756e-19	1.43472e-17	32.121
KCNMA1	-1.32822	3.3657	-9.20535	7.43894e-19	1.56615e-17	32.0294
CRISP1	-1.05493	0.201772	-9.2048	7.47191e-19	1.57138e-17	32.0251
CALD1	-1.26907	7.39097	-9.2015	7.67262e-19	1.61008e-17	31.999
PPP1R1A	-1.18939	1.54023	-9.20031	7.74654e-19	1.62383e-17	31.9896
ITGB6	-1.48027	2.37641	-9.18215	8.96436e-19	1.87505e-17	31.846
APOE	1.62226	6.68257	9.18016	9.10871e-19	1.90318e-17	31.8303
ADRA1D	-1.36667	1.53692	-9.17497	9.49685e-19	1.98e-17	31.7893
TNS1	-1.58176	5.99596	-9.1723	9.70265e-19	2.01855e-17	31.7682
PDLIM1	-1.10136	6.42672	-9.167	1.0124e-18	2.10394e-17	31.7264
SMOC1	-1.88047	3.78294	-9.16655	1.01604e-18	2.10877e-17	31.7229
EFEMP2	-1.15578	4.38671	-9.16583	1.02195e-18	2.11695e-17	31.7172
ITGB8	-1.23891	2.46032	-9.16428	1.03475e-18	2.1389e-17	31.7049
CD200	-1.23172	3.03672	-9.16309	1.04467e-18	2.15248e-17	31.6955
GSTM2	-1.20018	2.2997	-9.16192	1.05454e-18	2.17051e-17	31.6863
KCNJ8	-1.2265	3.45934	-9.15791	1.08898e-18	2.23901e-17	31.6547
TUBA4A	-1.17553	4.47285	-9.15581	1.10749e-18	2.27466e-17	31.6381
CD40	-1.22018	3.86953	-9.15377	1.12577e-18	2.30974e-17	31.622
C1QL1	-1.25705	1.11173	-9.1435	1.22231e-18	2.49721e-17	31.5411
EPHA2	-1.48652	3.24996	-9.14074	1.24962e-18	2.54761e-17	31.5194
SORBS1	-1.66933	5.01415	-9.13594	1.29864e-18	2.63366e-17	31.4816
MYBL2	1.45663	2.61077	9.13403	1.3186e-18	2.67134e-17	31.4666
ITIH5	-1.19016	3.0726	-9.12347	1.43493e-18	2.90092e-17	31.3834
WFDC2	-2.34494	5.77774	-9.12321	1.43781e-18	2.90371e-17	31.3815
ASPH	-1.04242	3.39241	-9.0993	1.74053e-18	3.49316e-17	31.1936
HES4	1.41238	5.1705	9.09247	1.83802e-18	3.67545e-17	31.14
SOX7	-1.09164	2.44115	-9.09241	1.83896e-18	3.67545e-17	31.1395
PHYHIP	-1.19608	2.24909	-9.09133	1.8549e-18	3.69966e-17	31.131
KRT23	-2.12703	3.2252	-9.08963	1.88015e-18	3.73845e-17	31.1177
TTC6	1.02336	3.38551	9.07008	2.19733e-18	4.33344e-17	30.9645
RBPMS	-1.15947	4.57104	-9.06984	2.20143e-18	4.33711e-17	30.9626
ISYNA1	-1.05131	4.82284	-9.06784	2.23674e-18	4.40219e-17	30.947
KIAA1644	-1.19194	1.8767	-9.05886	2.40257e-18	4.69036e-17	30.8767
HOXB8	-1.06922	0.442171	-9.05558	2.46605e-18	4.80458e-17	30.851
HJURP	1.2161	1.84052	9.05427	2.49199e-18	4.85021e-17	30.8408
MYH11	-1.96527	8.67229	-9.05241	2.52899e-18	4.91235e-17	30.8263
MMP26	1.62825	2.11538	9.03051	3.00991e-18	5.80565e-17	30.6551
FAM212A	-1.19993	2.54247	-9.01007	3.53968e-18	6.74631e-17	30.4958
NPR2	-1.00351	3.15579	-9.00484	3.68963e-18	6.99112e-17	30.455
DLX2	1.4196	1.59634	9.00308	3.74127e-18	7.08204e-17	30.4413
GPRASP1	-1.16305	3.29723	-8.99773	3.9032e-18	7.37411e-17	30.3997
COL23A1	-1.12359	1.95345	-8.99337	4.04039e-18	7.61758e-17	30.3657
CPAMD8	-1.38066	3.81461	-8.99239	4.07183e-18	7.66274e-17	30.3581
FHL1	-1.71357	5.98013	-8.98944	4.16812e-18	7.83631e-17	30.3351
QSOX1	-1.07026	4.79188	-8.98292	4.38866e-18	8.23492e-17	30.2844
ADCY5	-1.29403	3.28453	-8.96244	5.15961e-18	9.59767e-17	30.1254
FHOD3	-1.23772	3.0307	-8.96199	5.17814e-18	9.62288e-17	30.1219
PPP1R12B	-1.32994	4.92848	-8.95355	5.53499e-18	1.02663e-16	30.0564
LRCH2	-1.25915	2.60375	-8.95199	5.60336e-18	1.03831e-16	30.0443
MPZL2	-1.06068	5.55491	-8.93842	6.23626e-18	1.15118e-16	29.9391
LY6D	-1.57682	1.10349	-8.93391	6.46175e-18	1.18939e-16	29.9042
DPYSL3	-1.19445	6.3142	-8.92536	6.91231e-18	1.2687e-16	29.838
HAAO	-1.19415	2.95547	-8.92011	7.20347e-18	1.32089e-16	29.7974
SPON1	-1.53781	3.57261	-8.9133	7.59996e-18	1.3857e-16	29.7448
CLDN2	-1.29527	0.379013	-8.90893	7.86599e-18	1.43151e-16	29.7109
TCEAL7	-1.14715	2.9754	-8.90151	8.33874e-18	1.51043e-16	29.6536
NLGN3	-1.18322	2.65064	-8.90061	8.39739e-18	1.51963e-16	29.6467
ITGA2	-1.29499	3.14989	-8.89351	8.87918e-18	1.60082e-16	29.5919
VIT	-1.06706	1.22558	-8.8908	9.07062e-18	1.63229e-16	29.5709
STEAP1	1.32326	7.92299	8.88885	9.21047e-18	1.65591e-16	29.5559
PRDM8	-1.82171	3.45326	-8.8875	9.30847e-18	1.67198e-16	29.5455
FAM110C	-1.46142	2.37744	-8.88738	9.31742e-18	1.67203e-16	29.5445
ARMCX1	-1.55308	4.58678	-8.87337	1.03994e-17	1.861e-16	29.4366
KLK15	1.57153	2.8784	8.86736	1.09009e-17	1.94536e-16	29.3903
UBE2C	1.49955	3.09816	8.86478	1.11241e-17	1.97788e-16	29.3704
TP53INP1	1.05907	6.35378	8.84061	1.34401e-17	2.35074e-16	29.1845
GMDS	1.04546	5.37582	8.8375	1.37715e-17	2.40653e-16	29.1606
ACSL4	-1.11416	3.41569	-8.83392	1.4162e-17	2.46807e-16	29.1331
GPR126	-1.28513	2.01376	-8.81735	1.61184e-17	2.79391e-16	29.006
PARM1	-1.26457	6.51707	-8.81371	1.65826e-17	2.86922e-16	28.9781
RHOB	-1.18102	8.83689	-8.81286	1.66929e-17	2.88572e-16	28.9716
APOF	1.8442	3.39815	8.80933	1.71599e-17	2.95588e-16	28.9445
DMKN	-1.24713	2.33104	-8.79412	1.93199e-17	3.29564e-16	28.828
PDPN	-1.17851	3.40873	-8.79323	1.94531e-17	3.315e-16	28.8213
MSLN	-1.69016	1.65503	-8.79314	1.94677e-17	3.315e-16	28.8205
LAMB3	-2.10486	4.53732	-8.78789	2.0279e-17	3.44404e-16	28.7804
RND3	-1.39588	4.44033	-8.78034	2.15064e-17	3.63652e-16	28.7227
SEMG2	-3.05966	1.29894	-8.77649	2.21616e-17	3.7375e-16	28.6932
SPG20	-1.16793	4.25146	-8.767	2.38572e-17	4.00947e-16	28.6208
SSPN	-1.09518	3.5446	-8.76594	2.40547e-17	4.03915e-16	28.6127
DIXDC1	-1.04232	3.83022	-8.76458	2.43103e-17	4.07497e-16	28.6023
TMEM200B	-1.33582	3.46105	-8.75741	2.57031e-17	4.30098e-16	28.5476
EHD2	-1.19323	5.69858	-8.75549	2.60892e-17	4.36182e-16	28.5329
PTRF	-1.17251	7.85899	-8.75291	2.66171e-17	4.44623e-16	28.5132
WSCD2	-1.14577	1.71134	-8.75232	2.67388e-17	4.4627e-16	28.5087
STAC2	-1.63016	1.81942	-8.74872	2.74967e-17	4.58129e-16	28.4813
BICD1	1.2306	3.17026	8.72142	3.39767e-17	5.58866e-16	28.2734
RASL11B	-1.09213	2.15863	-8.71599	3.54375e-17	5.81903e-16	28.2321
GPX3	-1.4614	5.91079	-8.71365	3.60855e-17	5.91539e-16	28.2143
SGCE	-1.09257	3.9174	-8.7105	3.69754e-17	6.05101e-16	28.1903
CHST3	-1.11586	3.28884	-8.70847	3.75598e-17	6.14144e-16	28.1749
RAPGEFL1	-1.00163	2.59163	-8.7056	3.84033e-17	6.27405e-16	28.1531
SPOCK3	-1.64179	4.28731	-8.70249	3.9336e-17	6.421e-16	28.1296
CLIC6	-1.29621	2.96561	-8.69932	4.03135e-17	6.57501e-16	28.1055
PMEPA1	1.05201	8.73761	8.69863	4.0527e-17	6.60426e-16	28.1003
DYNC1I1	-1.00023	2.18988	-8.69633	4.12562e-17	6.71743e-16	28.0827
GLYATL1	1.91993	4.65152	8.69401	4.20006e-17	6.8214e-16	28.0652
DPT	-1.9801	3.77872	-8.6902	4.32553e-17	7.01338e-16	28.0363
HOXD11	-1.17955	1.72611	-8.68591	4.47127e-17	7.23148e-16	28.0037
RASSF5	-1.04252	2.92514	-8.67362	4.91592e-17	7.92247e-16	27.9106
PRKCA	-1.1456	3.22335	-8.67085	5.02209e-17	8.08176e-16	27.8896
HLF	-1.14702	3.13956	-8.66846	5.11557e-17	8.22534e-16	27.8715
MLC1	-1.12236	0.924767	-8.65719	5.57975e-17	8.93453e-16	27.7862
FGF2	-1.08799	2.32791	-8.64964	5.91365e-17	9.42235e-16	27.7291
ARHGEF25	-1.1004	4.37401	-8.64606	6.07855e-17	9.64884e-16	27.7021
ATP1B1	-1.21231	5.87461	-8.64518	6.11979e-17	9.69486e-16	27.6955
TSPAN2	-1.19968	3.59769	-8.62771	6.99967e-17	1.10345e-15	27.5636
EFS	-1.473	4.44688	-8.62552	7.11843e-17	1.12125e-15	27.547
BEND4	1.56203	3.8142	8.62182	7.32349e-17	1.15168e-15	27.5192
JPH2	-1.46851	3.76064	-8.62126	7.35525e-17	1.15573e-15	27.5149
ID3	-1.34693	6.38869	-8.61715	7.59063e-17	1.18789e-15	27.484
PIK3R1	-1.02824	4.34828	-8.61262	7.85918e-17	1.22892e-15	27.4498
DAPL1	-1.74379	1.39269	-8.61192	7.90175e-17	1.23458e-15	27.4445
KRT16	-1.55279	1.71134	-8.60762	8.16695e-17	1.2719e-15	27.4121
CPED1	-1.40983	3.3638	-8.59408	9.05944e-17	1.40523e-15	27.3103
TGFB1I1	-1.27076	4.50992	-8.59038	9.31995e-17	1.44287e-15	27.2824
EDNRA	-1.32293	4.44608	-8.58074	1.00338e-16	1.54397e-15	27.21
ACTA2	-1.48633	9.54373	-8.57693	1.03305e-16	1.58332e-15	27.1814
pk	-1.16035	4.12555	-8.57661	1.03558e-16	1.58595e-15	27.1789
PALM3	-1.21401	1.61377	-8.57456	1.05192e-16	1.60842e-15	27.1636
RBPMS2	-1.07667	4.2789	-8.57426	1.05437e-16	1.6109e-15	27.1613
ACTG2	-1.88066	9.15813	-8.57367	1.05913e-16	1.61688e-15	27.1569
FFAR2	1.60335	3.70335	8.57301	1.06453e-16	1.62385e-15	27.1519
NKX3-1	1.31265	10.0341	8.57193	1.07334e-16	1.63471e-15	27.1438
SYNC	-1.00987	1.81032	-8.57071	1.08338e-16	1.6487e-15	27.1346
SLIT1	1.57163	2.24445	8.56022	1.17384e-16	1.7816e-15	27.0559
NEXN	-1.43596	4.45347	-8.55079	1.26144e-16	1.90467e-15	26.9852
SOWAHA	-1.08091	1.85016	-8.54927	1.27614e-16	1.92537e-15	26.9739
FASN	1.4043	8.55069	8.54804	1.28812e-16	1.94192e-15	26.9647
HCAR2	-1.07466	1.74847	-8.54049	1.36452e-16	2.05223e-15	26.9081
CNN1	-1.68618	8.40116	-8.54039	1.36553e-16	2.05223e-15	26.9074
PCSK6	1.05506	2.23107	8.53669	1.4046e-16	2.10602e-15	26.8797
ZNF750	-1.52464	2.62107	-8.53628	1.40906e-16	2.11027e-15	26.8766
LGALS3	-1.24905	6.96374	-8.53225	1.45293e-16	2.17344e-15	26.8465
MYL9	-1.58637	9.65245	-8.53143	1.46207e-16	2.18542e-15	26.8403
SLC24A3	-1.17458	3.64159	-8.51118	1.70579e-16	2.53794e-15	26.689
SPEG	-1.06504	2.38268	-8.505	1.78781e-16	2.65385e-15	26.6429
EMILIN3	-1.02745	2.32842	-8.5004	1.8514e-16	2.73287e-15	26.6086
RGS9	-1.00679	1.61642	-8.50033	1.85236e-16	2.73287e-15	26.608
DTNA	-1.04498	2.40076	-8.49614	1.91237e-16	2.8171e-15	26.5768
TSHZ3	-1.00352	3.31289	-8.49042	1.99715e-16	2.93527e-15	26.5342
PNCK	-1.12187	2.55213	-8.4824	2.12263e-16	3.1126e-15	26.4744
ZIC2	1.56048	1.64467	8.47498	2.2454e-16	3.28266e-15	26.4192
DKK3	-1.28247	5.33933	-8.46298	2.45915e-16	3.56817e-15	26.3299
HSPB6	-1.64773	6.28303	-8.46226	2.47266e-16	3.58508e-15	26.3245
TIMP3	-1.22252	2.24248	-8.45638	2.58515e-16	3.73138e-15	26.2809
MATK	1.43348	2.51214	8.45534	2.60553e-16	3.75799e-15	26.2732
PLP1	-1.32288	1.62584	-8.44724	2.77031e-16	3.98376e-15	26.213
SERPINB1	-1.19428	4.18018	-8.44517	2.8139e-16	4.04344e-15	26.1976
ACSM1	2.46363	5.50142	8.4422	2.8778e-16	4.12912e-15	26.1756
SGCG	-1.14611	1.19791	-8.43802	2.97027e-16	4.25863e-15	26.1446
TACC1	-1.09745	4.91976	-8.42955	3.16659e-16	4.51666e-15	26.0817
BCL2	-1.11828	3.29427	-8.42901	3.17957e-16	4.53183e-15	26.0777
TLR3	-1.02663	2.38423	-8.42877	3.18514e-16	4.53642e-15	26.076
HIST3H2BB	1.16184	2.23846	8.42656	3.23893e-16	4.60285e-15	26.0596
PLIN4	-1.21489	3.44704	-8.40402	3.8389e-16	5.40382e-15	25.8928
SNPH	-1.00033	2.73037	-8.38853	4.31397e-16	6.03737e-15	25.7783
TRIM29	-1.9883	3.83111	-8.38774	4.33962e-16	6.06887e-15	25.7725
OR51E2	2.81213	8.14464	8.38527	4.42097e-16	6.16589e-15	25.7542
TAGLN	-1.44711	9.46755	-8.38506	4.42816e-16	6.17038e-15	25.7526
SMTN	-1.17442	5.53611	-8.38166	4.54273e-16	6.3209e-15	25.7276
CAMK1D	-1.01827	2.62006	-8.37732	4.69342e-16	6.52588e-15	25.6956
TMEM47	-1.08694	4.9098	-8.35978	5.35425e-16	7.39154e-15	25.5663
VTCN1	-1.52145	1.85655	-8.3574	5.45068e-16	7.50857e-15	25.5488
STARD8	-1.03257	2.49553	-8.35086	5.72487e-16	7.86386e-15	25.5006
GAS1	-1.36376	3.66029	-8.34875	5.81625e-16	7.97805e-15	25.4851
MPZ	-1.27338	1.78623	-8.34573	5.94926e-16	8.14704e-15	25.4629
GJB3	-1.2645	1.90053	-8.34197	6.11926e-16	8.36399e-15	25.4352
FLNC	-1.7834	5.90018	-8.34086	6.17036e-16	8.42789e-15	25.4271
MRVI1	-1.35454	4.31656	-8.3342	6.48619e-16	8.84052e-15	25.3781
ITGA9	-1.15958	3.23084	-8.32954	6.71646e-16	9.12862e-15	25.3439
CAPNS2	-1.47358	1.34022	-8.32755	6.81723e-16	9.25258e-15	25.3293
PDGFC	-1.11342	3.76617	-8.32528	6.93403e-16	9.40449e-15	25.3126
GGT6	-1.52037	2.83716	-8.31773	7.33667e-16	9.89504e-15	25.2572
TNS4	-2.0253	3.60732	-8.31703	7.37543e-16	9.93344e-15	25.252
C14orf159	-1.00802	3.78812	-8.31068	7.73369e-16	1.0387e-14	25.2055
HSD17B13	-1.91786	1.91103	-8.30772	7.90638e-16	1.06116e-14	25.1838
CKMT2	-1.02694	2.28318	-8.30284	8.2e-16	1.09904e-14	25.1481
KLK4	1.40031	10.1253	8.29669	8.58562e-16	1.14833e-14	25.103
RAB34	-1.05287	5.04696	-8.29195	8.89471e-16	1.18682e-14	25.0683
CDC20	1.22315	2.81975	8.2919	8.89796e-16	1.18682e-14	25.0679
TSPAN1	1.26198	10.1001	8.2886	9.11941e-16	1.21469e-14	25.0438
WISP2	-1.41069	1.60174	-8.28704	9.22627e-16	1.22723e-14	25.0324
TBX4	-1.60962	1.4197	-8.28183	9.59144e-16	1.27317e-14	24.9943
CLIC4	-1.03554	6.59483	-8.28031	9.70108e-16	1.28684e-14	24.9831
PNMA1	-1.00554	5.93003	-8.27657	9.97508e-16	1.32047e-14	24.9558
WFDC1	-1.25129	3.47733	-8.27612	1.00083e-15	1.32316e-14	24.9526
PYGM	-1.41296	2.90295	-8.27611	1.00091e-15	1.32316e-14	24.9525
GATA5	-1.23623	1.64902	-8.26974	1.04954e-15	1.38083e-14	24.9059
D4S234E	-1.51017	2.66063	-8.26923	1.05354e-15	1.38515e-14	24.9022
HEPH	-1.13897	3.07458	-8.26271	1.10587e-15	1.44903e-14	24.8547
FLNA	-1.53697	8.65195	-8.23928	1.31625e-15	1.71307e-14	24.6838
REEP1	-1.00488	2.54259	-8.22842	1.42671e-15	1.84688e-14	24.6048
P2RX1	-1.31244	2.32949	-8.22559	1.45698e-15	1.88481e-14	24.5842
ABO	-1.39152	1.81872	-8.22549	1.45806e-15	1.88494e-14	24.5835
ASPN	1.44708	3.63135	8.22439	1.47e-15	1.89851e-14	24.5755
KRT4	-1.76754	1.81809	-8.22434	1.47052e-15	1.89851e-14	24.5751
PHGR1	1.87943	2.43231	8.22058	1.51211e-15	1.947e-14	24.5478
LIMS2	-1.19312	4.24982	-8.21868	1.53357e-15	1.97332e-14	24.5339
PTGS2	-1.9239	4.04156	-8.21534	1.57193e-15	2.02134e-14	24.5097
RGS11	1.21964	3.37686	8.21511	1.57467e-15	2.02352e-14	24.508
TK1	1.07533	4.49545	8.21494	1.57666e-15	2.02472e-14	24.5068
SEMA5A	-1.06126	2.02722	-8.20384	1.71166e-15	2.19227e-14	24.4262
HIST1H2AM	1.13407	2.19547	8.19436	1.83606e-15	2.34227e-14	24.3574
OTX1	1.27356	2.21178	8.18739	1.93308e-15	2.45471e-14	24.3069
EME2	1.01065	3.17173	8.18656	1.94499e-15	2.46497e-14	24.3008
MAML2	-1.07951	3.27607	-8.18319	1.99405e-15	2.52054e-14	24.2764
GPX8	-1.03401	3.17125	-8.17662	2.09318e-15	2.63722e-14	24.2288
TRIB1	1.3991	7.08164	8.1755	2.11058e-15	2.6574e-14	24.2207
VGLL1	-1.1867	1.45948	-8.16166	2.33739e-15	2.93152e-14	24.1206
MKI67	1.09811	2.15434	8.15871	2.38881e-15	2.99019e-14	24.0993
DES	-1.75969	10.2705	-8.15321	2.48759e-15	3.10178e-14	24.0595
NPPC	-1.69413	1.60205	-8.14385	2.66505e-15	3.31024e-14	23.992
RCAN2	-1.16743	4.04943	-8.14184	2.70467e-15	3.35515e-14	23.9775
PEG10	-1.22222	1.67177	-8.13344	2.87708e-15	3.54626e-14	23.9169
FLRT3	-1.59582	3.17752	-8.13049	2.94021e-15	3.62176e-14	23.8956
STOM	-1.03023	6.53166	-8.12278	3.11161e-15	3.82072e-14	23.8401
INMT	-1.19179	4.39153	-8.12197	3.13e-15	3.83842e-14	23.8343
NCCRP1	-1.07946	1.29521	-8.11982	3.17994e-15	3.89472e-14	23.8188
CTNND2	1.02551	2.95789	8.11632	3.2627e-15	3.99355e-14	23.7936
HAGHL	1.11456	2.02157	8.10046	3.66522e-15	4.44961e-14	23.6795
GCNT1	1.56031	4.99174	8.09856	3.71654e-15	4.50625e-14	23.6659
TPX2	1.20939	2.83308	8.09115	3.924e-15	4.75183e-14	23.6126
GJB1	1.40204	6.67419	8.07212	4.51011e-15	5.42083e-14	23.4761
FZD8	1.18385	3.55439	8.06187	4.86095e-15	5.81718e-14	23.4027
AMOT	-1.15688	3.42444	-8.03371	5.96938e-15	7.06925e-14	23.2013
SLC45A2	1.76879	1.82281	8.03231	6.03037e-15	7.12402e-14	23.1914
ANO4	-1.13175	2.00312	-8.02813	6.21688e-15	7.32197e-14	23.1615
DDIT4	-1.19343	6.24729	-8.02664	6.2846e-15	7.38823e-14	23.1509
OLFML2A	-1.03267	3.0719	-8.02558	6.33318e-15	7.42625e-14	23.1433
TDRD1	2.13097	2.55809	8.02256	6.47394e-15	7.58314e-14	23.1218
ATCAY	-1.01642	1.58862	-8.00821	7.18605e-15	8.38676e-14	23.0195
RNF112	-1.066	1.63147	-7.98814	8.31319e-15	9.63455e-14	22.8767
RAB26	1.04303	3.65922	7.96869	9.5715e-15	1.10112e-13	22.7386
SLC2A4	-1.30067	2.79749	-7.96714	9.67935e-15	1.11154e-13	22.7276
PLAC9	-1.33045	2.97531	-7.95474	1.05878e-14	1.21012e-13	22.6397
NTF4	-1.10582	1.6175	-7.94421	1.1425e-14	1.30049e-13	22.5651
BCHE	-1.30192	2.04107	-7.9442	1.14256e-14	1.30049e-13	22.565
KLK3	1.5354	13.3347	7.94397	1.14443e-14	1.30185e-13	22.5634
RRM2	1.21299	2.33766	7.94333	1.14976e-14	1.30637e-13	22.5589
COLEC12	1.16932	5.17842	7.94205	1.16045e-14	1.31698e-13	22.5498
NRP2	-1.01866	2.53432	-7.93668	1.20633e-14	1.36424e-13	22.5118
ODAM	-1.02668	0.972095	-7.93488	1.22205e-14	1.37959e-13	22.4991
LUZP2	1.57463	3.26139	7.92262	1.33506e-14	1.50191e-13	22.4125
GDPD1	1.02828	3.44051	7.92168	1.34414e-14	1.51123e-13	22.4058
EFHD1	-1.08821	3.37899	-7.91115	1.45007e-14	1.62279e-13	22.3315
PKIB	1.27395	3.86551	7.90903	1.47237e-14	1.64679e-13	22.3165
CYP27A1	-1.59937	5.26551	-7.90796	1.48376e-14	1.65857e-13	22.309
CCDC78	1.16188	1.66932	7.90176	1.55144e-14	1.72922e-13	22.2653
RAB3B	1.31703	5.55186	7.9014	1.55548e-14	1.73272e-13	22.2627
MASP1	-1.44219	2.98083	-7.89983	1.57311e-14	1.75136e-13	22.2517
DDR2	-1.1467	3.47874	-7.89759	1.59865e-14	1.77672e-13	22.2359
DSC3	-1.51643	2.86989	-7.89145	1.67081e-14	1.85159e-13	22.1927
ROBO1	-1.12851	3.44696	-7.87763	1.84515e-14	2.02967e-13	22.0954
FOXD1	1.51402	1.78831	7.85892	2.11002e-14	2.3092e-13	21.964
SPARCL1	-1.21163	8.27805	-7.8533	2.19655e-14	2.39846e-13	21.9246
F12	1.01828	1.99447	7.84449	2.33964e-14	2.5375e-13	21.8628
EDNRB	-1.3434	3.26842	-7.83771	2.45579e-14	2.65453e-13	21.8154
GPX7	-1.10936	3.42709	-7.83668	2.47399e-14	2.67271e-13	21.8081
DLK2	-1.39612	3.26196	-7.83406	2.52062e-14	2.72156e-13	21.7898
ARHGEF19	-1.00517	3.28149	-7.83271	2.54516e-14	2.745e-13	21.7803
ID1	-1.61236	6.39752	-7.82736	2.6443e-14	2.84557e-13	21.7429
DNAJC15	-1.06427	2.53184	-7.8186	2.81497e-14	3.02081e-13	21.6816
MAP1B	-1.24627	4.36456	-7.79783	3.26398e-14	3.47756e-13	21.5367
CHST15	-1.0059	3.17048	-7.79664	3.29181e-14	3.50335e-13	21.5284
C4orf19	-1.10528	1.55917	-7.78711	3.52279e-14	3.73477e-13	21.462
TMEM100	-1.16253	2.19845	-7.77967	3.7142e-14	3.92434e-13	21.4101
TPM2	-1.45043	8.44694	-7.75547	4.41021e-14	4.62988e-13	21.2419
HSF4	1.25232	4.09801	7.75485	4.42985e-14	4.64798e-13	21.2376
THBS4	1.74445	4.9019	7.75331	4.47842e-14	4.69639e-13	21.2269
IER3	-1.49058	5.29914	-7.74899	4.61771e-14	4.83721e-13	21.1969
CHST9	-1.05191	1.29651	-7.7475	4.66662e-14	4.8858e-13	21.1866
ZFP36L1	-1.01053	7.20929	-7.74288	4.82191e-14	5.03474e-13	21.1545
KIF4A	1.00662	1.71246	7.72871	5.33035e-14	5.53697e-13	21.0564
TWIST1	1.46304	3.55182	7.72806	5.35522e-14	5.55856e-13	21.0518
CACNA1D	1.59843	3.41139	7.72605	5.43181e-14	5.62597e-13	21.0379
BMP5	-1.80654	1.26815	-7.72438	5.49635e-14	5.68672e-13	21.0263
TBX5	-1.08508	1.29761	-7.71688	5.79532e-14	5.98266e-13	20.9745
KRT5	-2.38989	6.03054	-7.69827	6.60878e-14	6.76884e-13	20.8459
SLC14A1	-1.96113	4.09766	-7.69182	6.91597e-14	7.06474e-13	20.8014
PDLIM7	-1.04762	5.78309	-7.69115	6.9488e-14	7.09453e-13	20.7968
C2orf40	-1.41694	4.06157	-7.68677	7.16649e-14	7.30521e-13	20.7666
B3GAT1	1.33483	3.06264	7.67304	7.89367e-14	8.00845e-13	20.6719
PROM1	-1.26337	1.48428	-7.6634	8.44683e-14	8.53299e-13	20.6056
CLCA4	-1.31437	1.02847	-7.65743	8.80885e-14	8.88562e-13	20.5646
HIST1H4E	1.61373	3.4236	7.64509	9.60511e-14	9.65858e-13	20.4799
SCRN1	-1.05325	4.87888	-7.634	1.03816e-13	1.04123e-12	20.4038
SCGB1A1	-2.68281	4.12738	-7.6339	1.03892e-13	1.04145e-12	20.403
CES1	-1.40665	4.55707	-7.62478	1.10743e-13	1.10668e-12	20.3405
TWIST2	-1.07139	3.00148	-7.62382	1.11484e-13	1.11352e-12	20.334
COMP	2.17311	4.62519	7.62372	1.11562e-13	1.11372e-12	20.3333
PHLDA1	-1.01501	3.31355	-7.62214	1.12804e-13	1.12496e-12	20.3225
KRT13	-2.53959	2.81642	-7.61949	1.14914e-13	1.14423e-12	20.3044
ARHGDIG	1.34117	1.82614	7.61934	1.15035e-13	1.14484e-12	20.3033
CALML3	-1.23586	1.47672	-7.60952	1.23215e-13	1.22185e-12	20.2361
HIST1H2AE	1.31808	6.42111	7.60924	1.23456e-13	1.22361e-12	20.2342
FADS1	-1.04393	3.31723	-7.60485	1.27299e-13	1.26041e-12	20.2042
FHL2	-1.07509	4.65147	-7.59599	1.35417e-13	1.33531e-12	20.1437
MAPK8IP2	1.00982	3.33593	7.59496	1.36392e-13	1.34424e-12	20.1367
OAT	-1.08197	5.8525	-7.59454	1.36796e-13	1.34753e-12	20.1338
TUBB2A	1.13906	5.75827	7.58613	1.45056e-13	1.42165e-12	20.0764
S100B	-1.21443	2.25552	-7.58228	1.49008e-13	1.45817e-12	20.0501
PLN	-1.32583	4.55074	-7.57608	1.55586e-13	1.51792e-12	20.0078
MCAM	-1.07005	4.88806	-7.56579	1.6713e-13	1.62481e-12	19.9378
FZD7	-1.00095	4.67278	-7.5578	1.76686e-13	1.70817e-12	19.8834
ITGB4	-1.25271	4.81685	-7.54234	1.96709e-13	1.89333e-12	19.7783
SGCA	-1.18521	3.60169	-7.5385	2.02012e-13	1.9405e-12	19.7523
GALNT7	1.16389	6.56195	7.53442	2.07815e-13	1.99327e-12	19.7246
PPP1R14A	-1.2274	4.67365	-7.52459	2.22472e-13	2.12344e-12	19.6579
PRSS16	-1.12321	2.29144	-7.52421	2.23047e-13	2.12776e-12	19.6554
MET	-1.11628	3.05971	-7.5229	2.25087e-13	2.14615e-12	19.6465
ALDH2	-1.02087	5.07197	-7.5224	2.2586e-13	2.1514e-12	19.6431
ETV5	-1.04737	2.60955	-7.52044	2.28953e-13	2.17764e-12	19.6298
YJEFN3	1.07482	2.44863	7.51623	2.35718e-13	2.23758e-12	19.6013
IL33	-1.12424	4.12894	-7.4927	2.77351e-13	2.60591e-12	19.4422
FEV	1.62493	4.23892	7.48914	2.84262e-13	2.66566e-12	19.4181
CAP2	-1.0406	3.91669	-7.47024	3.23819e-13	3.02049e-12	19.2907
PTGIS	-1.26396	4.03147	-7.46955	3.25362e-13	3.03195e-12	19.286
SLC25A27	1.04653	3.74462	7.4646	3.36637e-13	3.134e-12	19.2527
HIST1H3H	1.39426	3.90517	7.45963	3.48359e-13	3.23689e-12	19.2192
EDIL3	-1.05944	2.72492	-7.45146	3.68486e-13	3.41569e-12	19.1643
ERN2	-1.09645	1.0232	-7.44535	3.84297e-13	3.55034e-12	19.1232
SLC5A8	-1.04752	0.97219	-7.44302	3.90507e-13	3.59739e-12	19.1075
KLF5	-1.09433	4.947	-7.43755	4.05452e-13	3.72441e-12	19.0708
LFNG	1.11631	5.90692	7.42573	4.39695e-13	4.02176e-12	18.9915
C16orf89	-1.13705	2.27051	-7.40673	5.00801e-13	4.55696e-12	18.8642
SPON2	2.19187	8.29556	7.40482	5.07391e-13	4.61475e-12	18.8515
PCP4	-1.56177	6.5203	-7.39907	5.27739e-13	4.78855e-12	18.813
CCK	-1.99799	2.51465	-7.38815	5.6862e-13	5.14741e-12	18.74
CNTN1	-1.24967	3.34157	-7.38128	5.95889e-13	5.36911e-12	18.6942
NTN4	-1.24875	5.35989	-7.36013	6.8832e-13	6.15887e-12	18.5533
HSPB7	-1.26371	3.71235	-7.35556	7.10064e-13	6.33876e-12	18.5228
ANXA1	-1.14387	6.28692	-7.35228	7.26073e-13	6.4727e-12	18.5011
PI16	-1.92624	2.9221	-7.34549	7.60407e-13	6.76317e-12	18.4559
ZNF655	-1.14025	3.34786	-7.34196	7.78857e-13	6.92019e-12	18.4324
TMEM158	-1.09163	4.18643	-7.31213	9.53566e-13	8.40765e-12	18.2346
CASQ1	-1.29326	1.51275	-7.30363	1.01001e-12	8.88069e-12	18.1784
C4orf48	1.10842	3.07831	7.29474	1.07266e-12	9.39772e-12	18.1196
HSPB3	-1.42546	1.05429	-7.29353	1.08145e-12	9.46187e-12	18.1116
VSTM2L	1.57104	6.89743	7.28491	1.14632e-12	1.00067e-11	18.0547
CCDC3	-1.07546	3.99918	-7.27942	1.18962e-12	1.03707e-11	18.0184
SCGB2A1	-1.30886	3.21026	-7.25142	1.43667e-12	1.23902e-11	17.834
UPK1A	-1.73435	2.82406	-7.24844	1.46571e-12	1.26126e-11	17.8145
PCDH10	-1.12123	2.7193	-7.23439	1.61096e-12	1.37949e-11	17.7221
ATOH8	-1.00042	3.17761	-7.2098	1.89979e-12	1.61892e-11	17.561
PNMAL1	-1.13697	2.97059	-7.20219	1.99919e-12	1.69615e-11	17.5112
CRABP1	-1.09611	1.08727	-7.17158	2.45277e-12	2.06197e-11	17.3114
FABP3	-1.15679	5.07547	-7.16743	2.52166e-12	2.11712e-11	17.2844
PTGDS	-1.54777	7.2717	-7.16611	2.54401e-12	2.1332e-11	17.2757
BEX1	-1.46021	2.57996	-7.16358	2.5872e-12	2.16557e-11	17.2593
PDE5A	-1.21416	4.23627	-7.14053	3.01617e-12	2.50833e-11	17.1095
KIAA1244	1.12225	5.90536	7.13806	3.06619e-12	2.54883e-11	17.0934
MCOLN2	1.01511	2.08743	7.11774	3.50901e-12	2.89576e-11	16.9616
ITPR1	-1.24368	3.95489	-7.1156	3.55904e-12	2.93454e-11	16.9478
DUSP2	-1.33571	4.11367	-7.10953	3.70508e-12	3.05105e-11	16.9085
SDK1	1.34418	3.76638	7.10782	3.74736e-12	3.08455e-11	16.8975
MBOAT2	1.01046	5.93395	7.10285	3.87271e-12	3.18231e-11	16.8653
CPNE7	1.29322	2.58048	7.08355	4.39997e-12	3.59722e-11	16.7407
AHR	-1.00867	3.9854	-7.07879	4.54036e-12	3.70729e-11	16.71
RNF128	-1.08188	1.98015	-7.06638	4.92784e-12	4.00001e-11	16.6301
ALDH1A3	1.07056	7.62254	7.06083	5.11162e-12	4.1405e-11	16.5943
CKM	-2.07698	2.5176	-7.05113	5.44869e-12	4.39328e-11	16.532
TIMP4	-1.23728	2.21187	-7.0425	5.76699e-12	4.63831e-11	16.4766
NUDT8	1.39436	5.59813	7.02807	6.34031e-12	5.06779e-11	16.384
ETS2	-1.05139	5.82675	-7.02782	6.35077e-12	5.07406e-11	16.3824
ITGA5	-1.05711	4.90054	-7.02455	6.48846e-12	5.17978e-11	16.3615
RALGAPA2	1.0138	5.25307	7.02154	6.61808e-12	5.2789e-11	16.3422
FADS2	-1.604	4.89886	-7.00531	7.36083e-12	5.83523e-11	16.2384
PRR16	1.6087	4.5195	6.99862	7.6903e-12	6.08393e-11	16.1956
SH3RF1	1.06129	6.00743	6.98981	8.14602e-12	6.43392e-11	16.1394
HIST1H2BG	1.33533	5.57914	6.98876	8.20212e-12	6.47294e-11	16.1327
CSTA	-1.29645	3.44005	-6.97757	8.8245e-12	6.93297e-11	16.0614
HBB	-1.29897	3.7943	-6.96633	9.49535e-12	7.43886e-11	15.9899
PLA2G7	1.51243	6.08279	6.96147	9.80123e-12	7.66917e-11	15.9589
SRPX	-1.08116	3.50284	-6.95601	1.0156e-11	7.93068e-11	15.9242
TMC5	1.24249	5.3862	6.94093	1.12023e-11	8.70905e-11	15.8285
RPRM	-1.04125	2.78885	-6.93512	1.16334e-11	9.02605e-11	15.7917
SFRP5	-1.03957	0.949472	-6.93227	1.18508e-11	9.17628e-11	15.7736
SERPINF1	-1.09894	6.23814	-6.92857	1.21394e-11	9.38847e-11	15.7502
TMEM178A	1.80403	4.7262	6.89035	1.55482e-11	1.18721e-10	15.5087
HIST1H4D	1.01242	2.11158	6.8903	1.55534e-11	1.18721e-10	15.5084
TRIM22	-1.00257	3.97897	-6.88205	1.64047e-11	1.24825e-10	15.4564
TRPM8	1.63014	7.1373	6.86842	1.79123e-11	1.35815e-10	15.3707
COL10A1	1.52422	2.09766	6.86113	1.87731e-11	1.42007e-10	15.3249
PYGL	-1.00588	3.81444	-6.84044	2.14449e-11	1.60832e-10	15.1951
BMP7	-1.2171	2.79875	-6.79191	2.92652e-11	2.15142e-10	14.892
RSPO3	-1.04805	2.3573	-6.78789	3.00266e-11	2.20237e-10	14.8669
DEFB1	-1.70106	3.76006	-6.77435	3.2734e-11	2.38826e-10	14.7828
POF1B	-1.04186	1.69912	-6.76661	3.43897e-11	2.49774e-10	14.7347
COX7A1	-1.09953	4.86116	-6.76304	3.51791e-11	2.55124e-10	14.7125
INSM1	1.38199	2.15575	6.75564	3.68763e-11	2.66932e-10	14.6666
SERPINF2	-1.089	4.33782	-6.74885	3.85028e-11	2.77873e-10	14.6245
KCNK3	-1.39094	3.49535	-6.74877	3.8521e-11	2.779e-10	14.6241
FABP5	1.89303	4.31798	6.74691	3.89812e-11	2.81011e-10	14.6125
RNF157	1.24928	2.98375	6.74077	4.05297e-11	2.91412e-10	14.5745
CLEC3B	-1.02814	3.93333	-6.73572	4.18516e-11	3.00582e-10	14.5433
DEFB132	-1.05724	2.17448	-6.7194	4.64127e-11	3.31492e-10	14.4425
AOC3	-1.05904	5.39565	-6.71056	4.90809e-11	3.49259e-10	14.388
MAOB	-1.37467	5.80934	-6.71032	4.91558e-11	3.49663e-10	14.3865
CENPN	1.16168	4.98016	6.69854	5.29573e-11	3.75048e-10	14.3139
HSD11B1	-1.06649	2.87344	-6.6929	5.48785e-11	3.8766e-10	14.2792
LGALS3BP	-1.04079	7.71179	-6.68789	5.664e-11	3.99664e-10	14.2484
ENTPD5	1.22484	6.48308	6.6798	5.96037e-11	4.19811e-10	14.1987
CCDC154	1.0295	3.37725	6.67718	6.05951e-11	4.26483e-10	14.1826
GPR124	-1.14188	4.97422	-6.67404	6.18085e-11	4.3439e-10	14.1633
CST2	2.04142	3.41424	6.62181	8.57893e-11	5.91316e-10	13.844
MRGPRF	-1.06419	4.80989	-6.61302	9.06388e-11	6.22965e-10	13.7904
PIP	-2.1935	2.87503	-6.61012	9.22988e-11	6.32798e-10	13.7727
NID1	-1.014	4.385	-6.60021	9.81891e-11	6.71277e-10	13.7125
SAMD5	1.10778	3.30177	6.59775	9.97079e-11	6.80457e-10	13.6975
NDNF	-1.21027	2.9012	-6.57801	1.12766e-10	7.64176e-10	13.5777
GABRB3	1.11389	3.14222	6.57292	1.16396e-10	7.88224e-10	13.5468
CXCL13	-1.73849	2.21219	-6.56468	1.22514e-10	8.26011e-10	13.497
C2orf43	-1.01023	2.80378	-6.55121	1.33203e-10	8.95759e-10	13.4155
GSTM1	-2.02088	2.31938	-6.55032	1.33934e-10	8.99424e-10	13.4102
TGFB3	-1.16181	4.7967	-6.53702	1.45449e-10	9.7236e-10	13.3299
TBX1	1.30558	3.66299	6.52772	1.54062e-10	1.02852e-09	13.2739
LSAMP	-1.28568	3.45223	-6.52329	1.58345e-10	1.05638e-09	13.2472
ASCL2	-1.10191	1.82789	-6.49491	1.88659e-10	1.23978e-09	13.0767
SLC26A3	-1.46908	1.35319	-6.48489	2.00659e-10	1.31462e-09	13.0167
CD38	-1.85749	3.7379	-6.48343	2.0247e-10	1.32514e-09	13.008
LRRC26	1.31614	6.4605	6.48042	2.0626e-10	1.34766e-09	12.9899
DPYS	-1.25273	1.4606	-6.46839	2.22076e-10	1.44271e-09	12.9181
CTHRC1	1.14935	2.90255	6.42095	2.96917e-10	1.8914e-09	12.6355
NGFR	-1.0243	3.64106	-6.40297	3.3131e-10	2.09804e-09	12.5289
GNG13	1.03869	1.45645	6.40177	3.33751e-10	2.11281e-09	12.5218
OGN	-1.23551	4.43914	-6.38924	3.60194e-10	2.27128e-09	12.4476
MYOM1	-1.04447	1.89684	-6.38775	3.63465e-10	2.28966e-09	12.4388
MS4A8	1.48217	3.92879	6.38276	3.74663e-10	2.35406e-09	12.4093
CXCL6	-1.03217	1.91874	-6.37021	4.04292e-10	2.52627e-09	12.3353
FOXF1	-1.00556	3.96776	-6.35801	4.35328e-10	2.70882e-09	12.2634
MEX3A	1.15027	2.82828	6.33973	4.86199e-10	3.01178e-09	12.1559
CCDC80	-1.04511	3.74457	-6.33241	5.08187e-10	3.13793e-09	12.1129
KRT7	-1.68748	4.59191	-6.33021	5.14964e-10	3.17673e-09	12.1
AOC1	-1.98264	2.63355	-6.32961	5.16831e-10	3.18622e-09	12.0965
ADAM2	1.31099	1.54867	6.32537	5.30223e-10	3.26357e-09	12.0717
B3GNT3	-1.2192	2.04634	-6.30937	5.83867e-10	3.57894e-09	11.978
MMP9	1.33699	3.33726	6.29306	6.44023e-10	3.92651e-09	11.8827
CASQ2	-1.09912	2.26805	-6.2723	7.29358e-10	4.41199e-09	11.7617
RBP4	-1.00724	1.7897	-6.25842	7.9254e-10	4.76436e-09	11.681
CPXM1	-1.08927	3.32711	-6.25459	8.10894e-10	4.86713e-09	11.6588
DNASE2B	1.42359	4.0656	6.24353	8.66243e-10	5.17844e-09	11.5946
MZB1	1.08784	3.96058	6.24193	8.7452e-10	5.2263e-09	11.5854
SEMA3D	-1.13441	2.13488	-6.21525	1.0251e-09	6.08109e-09	11.431
SCNN1A	-1.15566	4.95382	-6.21439	1.03032e-09	6.1064e-09	11.4261
AK5	1.12869	2.31041	6.19968	1.12437e-09	6.6333e-09	11.3413
MUC4	-1.00357	1.19415	-6.17153	1.32823e-09	7.7649e-09	11.1795
TOP2A	1.04303	2.78782	6.12239	1.77411e-09	1.02048e-08	10.8985
NELL2	-1.10001	2.44622	-6.11826	1.81764e-09	1.04428e-08	10.8749
FCGBP	-1.16116	2.33866	-6.11748	1.82597e-09	1.04844e-08	10.8705
IRX4	1.25625	3.85849	6.10051	2.01681e-09	1.1522e-08	10.774
MME	-1.47383	5.10925	-6.09944	2.0295e-09	1.15876e-08	10.7679
CYP2J2	1.0859	3.80815	6.08204	2.24675e-09	1.27677e-08	10.6692
FILIP1L	-1.06911	4.387	-6.07064	2.40124e-09	1.36016e-08	10.6047
IGF2	-1.03017	3.05484	-6.06481	2.48422e-09	1.40469e-08	10.5717
DCN	-1.05874	5.30016	-6.04241	2.82996e-09	1.58673e-08	10.4453
BAIAP2L2	1.13126	2.3911	6.02715	3.09195e-09	1.72612e-08	10.3594
CCL18	1.21395	2.36389	6.02183	3.18866e-09	1.77754e-08	10.3296
PROK1	-1.30481	2.56395	-6.00873	3.43966e-09	1.90755e-08	10.2561
FGFBP1	-1.09801	1.28327	-6.00753	3.46355e-09	1.91915e-08	10.2494
HIST1H1E	1.13966	2.69956	6.00681	3.47811e-09	1.92391e-08	10.2453
MMP10	1.26854	3.04097	5.94067	5.08838e-09	2.75626e-08	9.87642
KRT14	-1.60867	4.68202	-5.93864	5.1477e-09	2.78604e-08	9.86519
SLPI	-1.71814	6.13115	-5.92374	5.60566e-09	3.01701e-08	9.78259
TFF3	1.9992	7.64255	5.90887	6.10218e-09	3.26243e-08	9.70034
NEFL	-1.12504	1.2139	-5.90326	6.30045e-09	3.36192e-08	9.66936
SGK1	-1.26791	4.32568	-5.89255	6.69632e-09	3.56823e-08	9.61032
SFRP4	1.29004	5.25987	5.83971	9.03387e-09	4.73806e-08	9.32028
SLC45A3	1.17293	10.3326	5.7892	1.20021e-08	6.19068e-08	9.0452
CEACAM6	-1.07031	1.95329	-5.78906	1.20117e-08	6.19395e-08	9.04443
DUSP4	-1.03936	3.25325	-5.77088	1.32984e-08	6.82109e-08	8.94593
KCNG3	1.0421	1.47524	5.75161	1.48087e-08	7.5397e-08	8.84183
SP5	1.05042	3.2879	5.68305	2.16599e-08	1.07753e-07	8.47398
KRT15	-1.75493	4.75281	-5.62164	3.03529e-08	1.47915e-07	8.14775
CHGB	-1.11865	2.06646	-5.56676	4.09283e-08	1.96186e-07	7.85891
PDIA2	1.11634	1.38943	5.54546	4.5933e-08	2.18281e-07	7.74748
KRT19	-1.12081	7.75853	-5.5442	4.62455e-08	2.19603e-07	7.74094
CXCL17	-1.48501	3.12435	-5.52495	5.13111e-08	2.42389e-07	7.64056
HIST1H4H	1.05501	5.65586	5.51189	5.50492e-08	2.59382e-07	7.57266
ATP8A2	1.14698	1.54235	5.50193	5.80779e-08	2.72114e-07	7.52096
CARTPT	-1.21196	1.69734	-5.46877	6.93687e-08	3.21046e-07	7.34949
ITGA8	-1.11063	3.81773	-5.45193	7.58929e-08	3.49483e-07	7.26275
C19orf33	-1.232	3.77924	-5.4491	7.70494e-08	3.54303e-07	7.24816
UGT2B4	1.34024	1.72489	5.44882	7.7165e-08	3.5475e-07	7.24672
NXPE4	-1.03171	1.06075	-5.44434	7.90286e-08	3.62627e-07	7.22369
SRMS	1.08173	3.181	5.41812	9.08397e-08	4.13388e-07	7.08933
NKAIN1	1.55713	3.68501	5.32655	1.47122e-07	6.52311e-07	6.6245
ACTA1	-1.70661	2.45731	-5.30361	1.65837e-07	7.29434e-07	6.50914
CDO1	-1.25787	3.40311	-5.28831	1.79571e-07	7.8307e-07	6.4325
CA3	-1.47317	1.60966	-5.28538	1.82326e-07	7.94188e-07	6.41784
SLC7A4	-1.21961	2.52074	-5.27225	1.95178e-07	8.46166e-07	6.35224
MESP1	1.14177	5.58759	5.26931	1.98179e-07	8.58788e-07	6.33755
CHIT1	1.02059	1.69963	5.23035	2.42351e-07	1.0411e-06	6.14383
HIST1H2BF	1.07602	2.95675	5.18787	3.01375e-07	1.27678e-06	5.9341
SERPINA11	1.35796	2.52948	5.1685	3.32689e-07	1.40085e-06	5.83901
C7	-1.1079	5.02583	-5.15331	3.59438e-07	1.50626e-06	5.76464
SLC34A2	-1.10902	1.67731	-5.0469	6.1454e-07	2.4926e-06	5.24925
RARRES1	-1.12675	4.65211	-5.04003	6.35996e-07	2.57584e-06	5.2163
CXCL11	1.01074	3.24468	5.02457	6.86902e-07	2.76621e-06	5.14237
ALOX15	1.1872	1.94228	5.01214	7.30722e-07	2.93428e-06	5.083
UNC5A	1.2942	1.99219	4.97273	8.88111e-07	3.52382e-06	4.89582
GABRP	-1.13319	2.85678	-4.94417	1.02218e-06	4.02212e-06	4.76097
SLC4A4	1.13621	6.49485	4.91209	1.19599e-06	4.66215e-06	4.6104
DKK1	-1.01732	2.444	-4.91012	1.20755e-06	4.70626e-06	4.60118
NR4A3	-1.10417	2.61456	-4.89332	1.31059e-06	5.0645e-06	4.5227
DNAH8	1.03012	1.92051	4.88535	1.36244e-06	5.24959e-06	4.48552
OLFM4	-2.011	4.9425	-4.87952	1.40156e-06	5.38741e-06	4.4584
SFTPA2	1.32519	5.4552	4.85286	1.59477e-06	6.07571e-06	4.33469
COL9A2	1.26753	6.36011	4.84167	1.68331e-06	6.4042e-06	4.28294
KRT17	-1.43223	6.64171	-4.83391	1.74747e-06	6.62481e-06	4.24712
PAGE4	-1.09606	3.84049	-4.8184	1.88287e-06	7.09818e-06	4.17568
TMEM45B	1.09478	4.75113	4.81695	1.89595e-06	7.14428e-06	4.16905
B3GNT6	1.4602	1.90178	4.76848	2.39054e-06	8.86455e-06	3.94724
SCNN1G	-1.00687	2.95164	-4.74573	2.66348e-06	9.81078e-06	3.84384
S100A2	-1.09333	3.36985	-4.73582	2.79161e-06	1.02593e-05	3.79892
ALDH3B2	1.01017	4.64696	4.73075	2.85942e-06	1.04845e-05	3.77597
SSTR1	1.07871	2.96335	4.71654	3.05783e-06	1.11528e-05	3.71185
PLA2G2A	1.67811	9.52664	4.68614	3.52817e-06	1.27337e-05	3.57513
CD177	-1.73095	4.80327	-4.52921	7.29113e-06	2.52899e-05	2.88257
WFDC12	-1.01699	1.4615	-4.50347	8.19648e-06	2.82276e-05	2.77107
COL2A1	1.61774	2.35408	4.44553	1.06454e-05	3.60699e-05	2.52222
ANKRD34B	1.15596	1.52775	4.4388	1.09714e-05	3.70837e-05	2.49352
F5	1.19086	3.84243	4.42952	1.14371e-05	3.84894e-05	2.45398
ERG	1.4452	4.06734	4.32355	1.82853e-05	5.97465e-05	2.00813
C1orf64	1.27553	2.2796	4.16507	3.62296e-05	0.000113046	1.36013
LTF	-1.90238	6.70164	-4.15758	3.73992e-05	0.000116339	1.33008
SERPINB11	-1.27366	2.43324	-4.02468	6.52015e-05	0.000194377	0.805083
ATF3	-1.00118	5.5414	-3.8916	0.000112023	0.00032137	0.295511
NEFH	-1.4972	7.13531	-3.77346	0.000178807	0.000494392	-0.14331
MUC6	-1.1979	1.23672	-3.7732	0.00017899	0.000494827	-0.144267
VSIG2	-1.04136	5.2884	-3.57871	0.000376365	0.000980853	-0.838633
OR51E1	1.18051	5.26232	3.57311	0.000384313	0.00100008	-0.858098
TMEFF2	1.04809	6.25001	3.30901	0.000998653	0.00240233	-1.7434
MYL1	-1.01563	0.876657	-3.20113	0.00144935	0.0033749	-2.08626
TGM4	-1.51204	3.61112	-3.19016	0.00150447	0.00349398	-2.12053
SPINK1	1.06738	2.21049	3.16065	0.00166239	0.00382351	-2.2121
PSCA	-1.10992	6.01269	-2.83297	0.00478394	0.0100477	-3.17371
