# Supplementary material for: Characterization of metabolism-associated molecular patterns in prostate cancer
Source: BMC Urol. 2023 Jun 6;23:104. doi: 10.1186/s12894-023-01275-w (PMC10243086; doi:10.1186/s12894-023-01275-w)
Supplement: Supplementary file 4 — Additional file 4. Table S2_venn_intersectGenes. [file 12894_2023_1275_MOESM4_ESM.xlsx]

## Sheet: venn_intersectGenes
Table S2_venn_intersectGenes
PIK3C2G
CA14
ASPA
QPRT
PYCR1
GSTM3
PNMT
AOX1
RPE65
GPX2
GSTP1
PIP5K1B
ETNK2
GATM
GSTM4
AKR1B1
PDE7B
PTGS1
LPCAT2
ALDH3A1
ME1
CYP3A5
ALDH1A2
ACSS3
GSTM5
PLA2G4A
ENTPD3
CERK
NT5E
CA12
GSTM2
ISYNA1
NPR2
ADCY5
HAAO
GMDS
ACSL4
GPX3
ACSM1
GGT6
CKMT2
PYGM
PTGS2
TK1
INMT
HAGHL
RRM2
GPX7
CES1
OAT
ALDH2
PTGIS
PTGDS
PDE5A
MBOAT2
ALDH1A3
CKM
FADS2
PLA2G7
PYGL
AOC3
MAOB
ENTPD5
GSTM1
CD38
DPYS
AOC1
AK5
CYP2J2
UGT2B4
CDO1
CA3
CHIT1
ALOX15
ALDH3B2
PLA2G2A
